# Supplementary material for: Clinical Benefit, Price, and Uptake for Cancer Biosimilars vs Reference Drugs in China: A Systematic Review and Meta-Analysis
Source: PubMed Central journal article supplement (PMC10570888; doi:10.1001/jamanetworkopen.2023.37348), 2023-10-12
Supplement: jamanetwopen-e2337348-s001.pdf [file jamanetwopen-e2337348-s001.pdf]

## Supplementary Online Content

Luo X, Du X, Li Z, et al. Clinical benefit, price, and uptake for cancer biosimilars vs reference drugs in China: a systematic review and meta-analysis. *JAMA Netw Open*. 2023;6(10):e2337348. doi:10.1001/jamanetworkopen.2023.37348

**eAppendix 1.** Detailed Description of the Eligibility and Exclusion Criteria

**eAppendix 2.** Evidence Sources and Search Strategy

**eAppendix 3.** Price and Uptake of Biosimilar and Reference Drugs

**eTable 1.** Comparison of Regulatory Factors for Biosimilar Oncology Drugs in the NMPA, FDA, EMA, and PMDA

**eTable 2.** Individual Biosimilar Guidelines Issued by the NMPA in China

**eTable 3.** Cancer biosimilars Approved by the FDA, EMA, PMDA, and NMPA as of February 1, 2023

**eTable 4.** Biosimilar Products Approved in China

**eTable 5.** Approved and In-Development Oncology Biosimilar Products in China as of February 1, 2023

**eTable 6.** Demographic and Clinical Characteristics of the Included RCTs

**eTable 7.** Demographic and Clinical Characteristics of the Included Cohort Studies

**eTable 8.** Results of the Risk of Bias Assessment of the RCTs Based on the Cochrane Collaboration's Tools

**eTable 9.** Results of the Risk of Bias Assessment of the Cohort Studies Based on the Newcastle-Ottawa Risk of Bias Assessment Tool

**eTable 10.** Characteristics of Pivotal Clinical Trials Used to Support Approval of Cancer Biosimilars by the NMPA, FDA, EMA, and PMDA

**eTable 11.** Subgroup Analysis of Cancer Biosimilars Compared With Reference Drugs Derived From Randomized Clinical Trials

**eTable 12.** Pooled Analysis of Efficacy, Safety, and Immunogenicity of Cancer Biosimilars Derived From Randomized Clinical Trials

**eTable 13.** Pooled Analysis of Efficacy, Safety, and Immunogenicity of Cancer Biosimilars Derived From Cohort Studies

**eTable 14.** Weighted Mean Price per Unit of Rituximab, Bevacizumab, Trastuzumab, and Their Biosimilars Between 2015 and 2022

**eTable 15.** Trends in the Uptake Rate of Rituximab, Bevacizumab, and Trastuzumab Biosimilars vs Reference Drugs After Market Entry as of December 2022

**eTable 16.** Uptake Rates of Cancer Biosimilars vs Reference Drugs in the First Year, Second Year, and Latest Time on the Market

**eTable 17.** Reimbursable Cancer Indications for the Biosimilars and Reference Drugs of Bevacizumab, Rituximab, and Trastuzumab in the National Reimbursement Drug List in China as of July 1, 2023

**eTable 18.** Comparison of the Approved Indications of Cancer Biosimilars vs Reference Drugs by the NMPA, FDA, EMA, and PMDA as of July 2023

**eFigure 1.** Development History of Biosimilars in China

**eFigure 2.** Flowchart of Included Studies for the Systematic Review and Meta-analysis

**eFigure 3.** Meta-analysis of the Primary Efficacy End Points Between Bevacizumab Biosimilars and the Originator Derived from RCTs

**eFigure 4.** Meta-analysis of the Primary Efficacy End Points Between Rituximab Biosimilars and the Originator Stratified by Cancer Type Derived From RCTs

**eFigure 5.** Meta-analysis of the Primary Efficacy End Points Between Trastuzumab Biosimilars and the Originator Stratified by Cancer Type Derived From RCTs

**eFigure 6.** Sensitivity Analysis of Primary Efficacy End Points for Bevacizumab Derived From RCTs

**eFigure 7.** Sensitivity Analysis of Primary Efficacy End Points for Rituximab Derived From RCTs

**eFigure 8.** Sensitivity Analysis of Primary Efficacy End Points for Trastuzumab Derived From RCTs

**eFigure 9.** Publication Bias Assessment of Primary Efficacy End Points for Bevacizumab Derived From RCTs

**eFigure 10.** Publication Bias Assessment of Primary Efficacy End Points for Rituximab Derived From RCTs

**eFigure 11.** Publication Bias Assessment of Primary Efficacy End Points for Trastuzumab Derived From RCTs

**eReferences**

This supplementary material has been provided by the authors to give readers additional information about their work.

## **eAppendix 1.** A detailed description of the eligibility and exclusion criteria

### **Eligibility criteria**

**Participants:** the patient was diagnosed with a malignant cancer that met the criteria of international guidelines. We did not limit the age, sex, number of lines of treatment, stage of the cancer, and other primary demographic characteristics of the patients with the cancer.

**Intervention and Comparators:** the intervention group was any of the rituximab biosimilars, trastuzumab biosimilars, and bevacizumab biosimilars (As of February 2023, only these three therapeutic cancer biosimilars have been approved in China). The comparators were their reference drug. We did not have any restrictions on dosage, treatment duration, treatment regimen, or number of patients included.

**Study designs:** we included randomized controlled trials (RCT) and cohort studies (comparative studies of biosimilars and originator drugs). The RCT was limited to explicit pre-specification for a non-inferiority or equivalence trial design. In addition, the primary endpoints of randomized controlled trials should include at least one of the efficacy endpoints. For the cohort studies, we did not restrict the study design (equipotent or noninferiority) and did not set out to have at least one primary efficacy endpoint, considering the evidence from the cohort studies as complementary evidence to the RCT.

### **Exclusion criteria**

- (1) Non-comparative studies (e.g., reviews, expert commentaries, editorials, and clinical guidelines);
- (2) Studies without comparators;
- (3) The primary endpoints of the randomized controlled trials were pharmacokinetic parameters or safety;
- (4) The data for the cohort study design were derived from survey research.

## Appendix 2. Evidence sources and search strategy.

We conducted a systematic search based on PICO items in Embase, PubMed, Cochrane Library and ClinicalTrials.gov from database inception to February 1, 2023. XXL and XD were responsible for screening documents independently that met the inclusion criteria by title, abstract, and full text. If there was an inconsistency, it is resolved by the third reviewer.

**Participants:** Carcinoma or cancer or adenocarcinoma or tumor or oncology or neoplasm or malignant or lymphoma.

**Intervention:** biosimilar or 'follow-on biologic' or 'subsequent-entry biologic' or 'similar biologic' or 'highly similar' OR 'biologic copy' or 'subsequent-entry biological' or 'subsequent-entry biologic' or 'subsequent entry biologic' or 'subsequent entry biological' or 'biosimilarity' or Riabni or Ruxience or Truxima or rituximab-arrx or rituximab-pvvr or rituximab-abbs or Herzuma or trastuzumab-pkrb or Kanjinti or trastuzumab-anns or Ogivri or trastuzumab-dkst or Ontruzant or trastuzumab-dttb or Trazimera or trastuzumab-qyyp or Mvasi or bevacizumab-awwb or Zirabev or bevacizumab-bvzr.

**Comparators:** Avastin or bevacizumab or Herceptin or trastuzumab or Rituxan or Rituximab or reference or originator or brand name or brand-name.

**Study designs:** Compared or comparison or compare or contrast or versus or equivalence or switching or equivalent or equivalence or equivalence or comparing.

The research strategy was similar to the previous study [JAMA Oncol. 2022;8(4):537-545] and the search strategy in this study as follow:

| Search strategy of PubMed |                                                                                                                                                                                                                                                                                                                                                                                                                                                                                                                                                                                                                                                                                                                                                                                                                                                                                                                                                                                                                                                     |
|---------------------------|-----------------------------------------------------------------------------------------------------------------------------------------------------------------------------------------------------------------------------------------------------------------------------------------------------------------------------------------------------------------------------------------------------------------------------------------------------------------------------------------------------------------------------------------------------------------------------------------------------------------------------------------------------------------------------------------------------------------------------------------------------------------------------------------------------------------------------------------------------------------------------------------------------------------------------------------------------------------------------------------------------------------------------------------------------|
| #1                        | Carcinoma[Title/Abstract] OR cancer[Title/Abstract] OR adenocarcinoma[Title/Abstract] OR tumor[Title/Abstract] OR oncology[Title/Abstract] OR neoplasm[Title/Abstract] OR malignant[Title/Abstract] OR lymphoma[Title/Abstract]                                                                                                                                                                                                                                                                                                                                                                                                                                                                                                                                                                                                                                                                                                                                                                                                                     |
| #2                        | biosimilar[Title/Abstract] OR 'follow-on biologic'[Title/Abstract] OR 'subsequent-entrybiologic'[Title/Abstract] OR 'similar biologic'[Title/Abstract] OR 'highly similar'[Title/Abstract] OR 'biologic copy'[Title/Abstract] OR 'subsequent-entry biological'[Title/Abstract] OR 'subsequent-entry biologic'[Title/Abstract] OR 'subsequent entry biological'[Title/Abstract] OR 'biosimilarity'[Title/Abstract] OR Riabni[Title/Abstract] OR Ruxience[Title/Abstract] OR Truxima[Title/Abstract] OR rituximab-arrx[Title/Abstract] OR rituximab-pvvr[Title/Abstract] OR rituximab-abbs[Title/Abstract] OR Herzuma[Title/Abstract] OR trastuzumab-pkrb[Title/Abstract] OR Kanjinti or trastuzumab-anns[Title/Abstract] OR Ogivri[Title/Abstract] OR trastuzumab-dkst[Title/Abstract] OR Ontruzant[Title/Abstract] OR trastuzumab-dttb[Title/Abstract] OR Trazimera[Title/Abstract] OR trastuzumab-qyyp[Title/Abstract] OR Mvasi[Title/Abstract] OR bevacizumab-awwb[Title/Abstract] OR Zirabev[Title/Abstract] OR bevacizumab-bvzr[Title/Abstract] |
| #3                        | Avastin[Title/Abstract] OR bevacizumab[Title/Abstract] OR Herceptin[Title/Abstract] OR trastuzumab[Title/Abstract] OR Rituxan[Title/Abstract] OR Rituximab[Title/Abstract] OR reference[Title/Abstract] OR originator[Title/Abstract] OR brand name[Title/Abstract] OR brand-name[Title/Abstract]                                                                                                                                                                                                                                                                                                                                                                                                                                                                                                                                                                                                                                                                                                                                                   |
| #4                        | Compared[Title/Abstract] OR comparison[Title/Abstract] OR compare[Title/Abstract] OR contrast[Title/Abstract] OR versus[Title/Abstract] OR equivalence[Title/Abstract] OR switching[Title/Abstract] OR equivalent[Title/Abstract] OR equivalence[Title/Abstract] OR equivalence[Title/Abstract] OR comparing[Title/Abstract]                                                                                                                                                                                                                                                                                                                                                                                                                                                                                                                                                                                                                                                                                                                        |
| #5                        | #1 and #2 and #3 and #4                                                                                                                                                                                                                                                                                                                                                                                                                                                                                                                                                                                                                                                                                                                                                                                                                                                                                                                                                                                                                             |
| Search strategy of Embase |                                                                                                                                                                                                                                                                                                                                                                                                                                                                                                                                                                                                                                                                                                                                                                                                                                                                                                                                                                                                                                                     |

|                                              |                                                                                                                                                                                                                                                                                                                                                                                                                                                                                                                                                                                                                                                                                                                                                                                                           |
|----------------------------------------------|-----------------------------------------------------------------------------------------------------------------------------------------------------------------------------------------------------------------------------------------------------------------------------------------------------------------------------------------------------------------------------------------------------------------------------------------------------------------------------------------------------------------------------------------------------------------------------------------------------------------------------------------------------------------------------------------------------------------------------------------------------------------------------------------------------------|
| #1                                           | carcinoma:ab,ti OR cancer:ab,ti OR adenocarcinoma:ab,ti OR tumor:ab,ti OR oncology:ab,ti OR neoplasm:ab,ti OR malignant:ab,ti OR lymphoma:ab,ti                                                                                                                                                                                                                                                                                                                                                                                                                                                                                                                                                                                                                                                           |
| #2                                           | biosimilar:ab,ti OR 'follow-on biologic':ab,ti OR 'subsequent-entrybiologic':ab,ti OR 'similar biologic':ab,ti OR 'highly similar':ab,ti OR 'biologic copy':ab,ti OR 'subsequent-entry biological':ab,ti OR 'subsequent-entry biologic':ab,ti OR 'subsequent entry biologic':ab,ti OR 'subsequent entry biological':ab,ti OR 'biosimilarity':ab,ti OR riabni:ab,ti OR ruxience:ab,ti OR truxima:ab,ti OR 'rituximab arrx':ab,ti OR 'rituximab pvvr':ab,ti OR 'rituximab abbs':ab,ti OR herzuma:ab,ti OR 'trastuzumab pkrb':ab,ti OR 'kanjinti ortrastuzumab-anns':ab,ti OR ogivri:ab,ti OR 'trastuzumab dkst':ab,ti OR ontruzant:ab,ti OR 'trastuzumab dttb':ab,ti OR trazimera:ab,ti OR 'trastuzumab qyyp':ab,ti OR mvasi:ab,ti OR 'bevacizumab awwb':ab,ti OR zirabev:ab,ti OR 'bevacizumab bvzr':ab,ti |
| #3                                           | avastin:ab,ti OR bevacizumab:ab,ti OR herceptin:ab,ti OR trastuzumab:ab,ti OR rituxan:ab,ti OR rituximab:ab,ti OR reference:ab,ti OR originator:ab,ti OR 'brand name':ab,ti                                                                                                                                                                                                                                                                                                                                                                                                                                                                                                                                                                                                                               |
| #4                                           | compared:ab,ti OR comparison:ab,ti OR compare:ab,ti OR contrast:ab,ti OR versus:ab,ti OR switching:ab,ti OR equivalent:ab,ti OR equivalence:ab,ti OR comparing:ab,ti                                                                                                                                                                                                                                                                                                                                                                                                                                                                                                                                                                                                                                      |
| #5                                           | #1 and #2 and #3 and #4                                                                                                                                                                                                                                                                                                                                                                                                                                                                                                                                                                                                                                                                                                                                                                                   |
| <b>Cochrane library</b>                      |                                                                                                                                                                                                                                                                                                                                                                                                                                                                                                                                                                                                                                                                                                                                                                                                           |
| #1                                           | (Carcinoma or cancer or adenocarcinoma or adenocarcinoma or malignancy or tumor or oncology or neoplasm or malignant or malignant or lymphoma):ti,ab,kw                                                                                                                                                                                                                                                                                                                                                                                                                                                                                                                                                                                                                                                   |
| #2                                           | (biosimilar or 'follow-on biologic' or 'subsequent-entrybiologic' or 'similar biologic' or 'highly similar' OR 'biologic copy' or 'subsequent-entry biological' or 'subsequent-entry biologic' or 'subsequent entry biologic' or 'subsequent entry biological' or 'biosimilarity' or Riabni or Ruxience or Truxima or rituximab-arrx or rituximab-pvvr or rituximab-abbs or Herzuma or trastuzumab-pkrb or Kanjinti ortrastuzumab-anns or Ogivri or trastuzumab-dkst or Ontruzant or trastuzumab-dttb or Trazimera or trastuzumab-qyyp or Mvasi or bevacizumab-awwb or Zirabev or bevacizumab-bvzr):ti                                                                                                                                                                                                    |
| #3                                           | (Avastin or bevacizumab or Herceptin or trastuzumab or Rituxan or Rituximab or reference or originator or brand name or brand-name):ti                                                                                                                                                                                                                                                                                                                                                                                                                                                                                                                                                                                                                                                                    |
| #4                                           | (Carcinoma or cancer or adenocarcinoma or adenocarcinoma or malignancy or tumor or oncology or neoplasm or malignant or malignant or lymphoma):ti,ab,kw                                                                                                                                                                                                                                                                                                                                                                                                                                                                                                                                                                                                                                                   |
| #5                                           | #1 and #2 and #3 and #4                                                                                                                                                                                                                                                                                                                                                                                                                                                                                                                                                                                                                                                                                                                                                                                   |
| <b>Search strategy of Clinicaltrials.gov</b> |                                                                                                                                                                                                                                                                                                                                                                                                                                                                                                                                                                                                                                                                                                                                                                                                           |

|    |                                                                                                                                                                                                                                                               |
|----|---------------------------------------------------------------------------------------------------------------------------------------------------------------------------------------------------------------------------------------------------------------|
| #1 | (Rituximab OR Trastuzumab OR Bevacizumab) AND Biosimilar AND ("compared" OR "comparison" OR "compare" OR "contrast" OR "versus" OR "equivalence" OR "switching" OR "equivalent" OR "equivalence" OR "bioequivalence" OR "comparing")   Completed WITH RESULTS |
|----|---------------------------------------------------------------------------------------------------------------------------------------------------------------------------------------------------------------------------------------------------------------|

### **eAppendix 3. Price and uptake of biosimilar and reference drugs.**

The Chinese healthcare system is established under a multi-tiered governance structure, involving the central, provincial, regional, and county governments<sup>1,2</sup>. The majority of drug procurement occurs through centralized bidding at the provincial or city level, which may result in regional variations<sup>1</sup>. Therefore, XXL and XD extracted the winning prices of each biosimilar and originator drug between 2015-2022 from different provinces or cities and calculated the weighted average price of the drug using the number of population as weights. The exchange rate of the U.S. dollar to the Chinese yuan was 6.9. Similar to the previous study<sup>1</sup>, we adjusted the price of biosimilars and their reference drug based on the annual consumption index published by the National Bureau of Statistics of China given the effect of inflation.

The healthcare facilities are categorized into primary healthcare facilities, first, second and third level hospitals in China. Usually, a higher level means a greater level of treatment. In this study, we used the national hospital sales volume from Pharnexcloud database module<sup>3</sup>, which covered the sales volume of cancer biosimilars in secondary and higher hospitals across the country, as no public database of drug sales volume was available. XXL and XD extracted the sales volume of each cancer biosimilar and originator drugs for each quarter since the biosimilar was introduced to the market. For multiple biosimilars that were approved (e.g. eight bevacizumab biosimilars were approved in China), we aggregated the sales volume of these biosimilars. The annual uptake rate for biosimilars is calculated by dividing the one-year sales of biosimilars by the one-year sales of their reference drugs.

The cut-off date for price uptake rates of biosimilars was December 31, 2022.

**eTable 1. Comparison of regulatory factors for biosimilar oncology drugs in the NMPA, FDA, EMA, and PMDA.**

| Items                                                           | NMPA                                                                                                                                              | FDA                                                                                                                                  | EMA                                                                 | PMDA                                                                                                                                                                                                                                                                                  |
|-----------------------------------------------------------------|---------------------------------------------------------------------------------------------------------------------------------------------------|--------------------------------------------------------------------------------------------------------------------------------------|---------------------------------------------------------------------|---------------------------------------------------------------------------------------------------------------------------------------------------------------------------------------------------------------------------------------------------------------------------------------|
| Key patent expiration of Bevacizumab                            | 2018                                                                                                                                              | 2017                                                                                                                                 | 2018                                                                | 2017                                                                                                                                                                                                                                                                                  |
| Key patent expiration of Rituximab                              | 2013                                                                                                                                              | 2018                                                                                                                                 | 2013                                                                | NA                                                                                                                                                                                                                                                                                    |
| Key patent expiration of Trastuzumab                            | NA                                                                                                                                                | 2019                                                                                                                                 | 2014                                                                | NA                                                                                                                                                                                                                                                                                    |
| Patent challenges                                               | Rarely occur                                                                                                                                      | Either formal litigation in court or administrative challenges (inter partes reviews) occur for 56% of approved oncology biosimilars | Rarely occur                                                        | In January, 2019, Celltrion won two appeal cases claiming that Roche's patent for trastuzumab for the treatment of HER2-positive breast cancer was invalid; Tokyo District Court dismissed Genentech's claim against Sandoz-Kirin to prohibit the marketing of a rituximab biosimilar |
| Indication extrapolation                                        | Primary consideration is given to core patents, with more limited impact of patents on indications; Exclusivity periods have not been established | Impact of core and indication patents; Impact of exclusivity period (especially for 7-year orphan drug designation)                  | Impact of core and indication patents; Impact of exclusivity period | Impact of core and indication patents; Impact of exclusivity period.                                                                                                                                                                                                                  |
| Reimbursement policy                                            | Determined by China National Healthcare Security Administration                                                                                   | Determined by individual insurers                                                                                                    | Determined by national authorities                                  | Determined centrally by Japan's Central Social Medical Insurance Council of the Ministry of Health, Labour, and Welfare                                                                                                                                                               |
| Switching of patients from a reference biologic to a biosimilar | No regulatory designation for interchangeability                                                                                                  | Not permitted unless the biosimilar has been formally designated as interchangeable by FDA                                           | No regulatory designation for interchangeability                    | Permitted under the PMDA's Guideline for the quality, safety, and efficacy assurance of follow-on biologics (revised Feb 2, 2020)                                                                                                                                                     |



|                                                                          |                                                                                                                                      |                                                                                                                                                                                                                                        |                                                                         |                                                                                                                                                                                    |
|--------------------------------------------------------------------------|--------------------------------------------------------------------------------------------------------------------------------------|----------------------------------------------------------------------------------------------------------------------------------------------------------------------------------------------------------------------------------------|-------------------------------------------------------------------------|------------------------------------------------------------------------------------------------------------------------------------------------------------------------------------|
| <b>Pharmacist substitution of a reference biologic with a biosimilar</b> | Not permitted                                                                                                                        | Not permitted unless FDA has designated the biosimilar as interchangeable with the reference biologic, and even if it has 45 US states do not permit substitution unless patient consent, doctor consent, or both have been documented | Permitted in several EU countries                                       | Not permitted                                                                                                                                                                      |
| <b>Price</b>                                                             | Price competition; Price discounts of biosimilars in China range from 10-31% in 2022 (the data derived from eTable 14 of this study) | Price competition; Price discounts of biosimilars in the USA range from 10% to 33%; Impact of pay for delaying agreements between biosimilars and originator drugs                                                                     | Price competition; European price discounts for biosimilars average 30% | The Japanese Ministry of Health, Labour, and Welfare sets prices for biosimilars at a 30% discount in principle, and at 40% if the biosimilar has ten or more approved indications |

Items of FDA, EMA, and PMDA derived from published literature (Lancet Oncol. 2020;21(12):e575-e588).

Abbreviations: NA, not applicable; FDA, US Food and Drug Administration; EMA, European Medicines Agency; PMDA, Japanese Pharmaceuticals and Medical Devices Agency; NMPA, National Medical Products Administration.

**eTable 2. Individual biosimilar guidelines issued by the NMPA in China(n=10).**

| <b>Initiation date</b> | <b>Guidelines</b>                                                          | <b>Biosimilar approval or not</b> |
|------------------------|----------------------------------------------------------------------------|-----------------------------------|
| 2020-05-28             | Clinical trial design guidelines for liraglutide injection biosimilars     | No                                |
| 2020-07-20             | Guidelines for clinical trials of rituximab injection biosimilars          | Yes                               |
| 2020-07-20             | Guidelines for clinical trials of trastuzumab biosimilars for injection    | Yes                               |
| 2020-08-03             | Clinical trial guidelines for adalimumab injection biosimilars             | Yes                               |
| 2020-08-03             | Clinical trial guidelines for bevacizumab injection biosimilars            | Yes                               |
| 2021-02-04             | Guidelines for clinical trials of omalizumab biosimilars for injection     | No                                |
| 2021-04-22             | Guidelines for clinical trials of tolimumab injection biosimilars          | Yes                               |
| 2021-04-22             | Guidelines for clinical trials of patalizumab injection biosimilars        | No                                |
| 2022-01-20             | Clinical trial design guidelines for cetuximab injection biosimilars       | No                                |
| 2022-01-26             | Guidelines for clinical trial design of teriparatide injection biosimilars | Yes                               |

**eTable 3. The cancer biosimilars approved by the FDA, EMA, PMDA, and NMPA (as of February 1, 2023).**

| Product     | NMPA             |                                                                                                                                                       | EMA              |                                                                                                                          | FDA              |                                                                                            | PMDA             |                                                                                                                                 |
|-------------|------------------|-------------------------------------------------------------------------------------------------------------------------------------------------------|------------------|--------------------------------------------------------------------------------------------------------------------------|------------------|--------------------------------------------------------------------------------------------|------------------|---------------------------------------------------------------------------------------------------------------------------------|
| INN         | Reference        | Biosimilars                                                                                                                                           | Reference        | Biosimilars                                                                                                              | Reference        | Biosimilars                                                                                | Reference        | Biosimilars                                                                                                                     |
| Bevacizumab | Avastin (2010)   | Ankeda (2019)<br>Dayoutong (2020)<br>Boyounuo (2021)<br>Airuituo (2021)<br>Pubeixi (2021)<br>Beianging (2021)<br>Puxinting (2021)<br>Hanbeitai (2021) | Avastin (2005)   | Mvasi (2018)<br>Zirabev (2019)<br>Aybintio (2020)<br>Alymsys (2021)<br>Oyavas (2021)<br>Abevmy (2021)<br>Vegzelma (2022) | Avastin (2004)   | Mvasi (2017)<br>Zirabev (2019)<br>Alymsys (2022)<br>Vegzelma (2022)                        | Avastin (2007)   | Bevacizumab(Pfizer) (2019)<br>Bevacizumab (Daiichi Sankyo) (2019)<br>Bevacizumab (Nichiiko) (2021)<br>Bevacizumab (CTNK) (2022) |
| Rituximab   | Mabthera (2000)  | Hanlikang (2019)<br>Dabohua (2020)                                                                                                                    | Mabthera (1998)  | Truxima (2017)<br>Rixathon (2017)<br>Ruxience (2020)                                                                     | Rituxan (1997)   | Truxima (2018)<br>Ruxience (2019)<br>Riabni (2020)                                         | Rituxan (2001)   | Rituximab (KHK) (2017)<br>Rituximab (Pfizer) (2019)                                                                             |
| Trastuzumab | Herceptin (2002) | Hanyouqu (2020)                                                                                                                                       | Herceptin (1998) | Ontruzant (2017)<br>Herzuma (2018)<br>Kanjinti (2018)<br>Trazimera (2018)<br>Ogivri (2018)<br>Zercepac (2020)            | Herceptin (1998) | Ogivri (2017)<br>Herzuma (2018)<br>Ontruzant (2019)<br>Trazimera (2019)<br>Kanjinti (2019) | Herceptin (2001) | Trastuzumab (NK/CTH) (2017)<br>Trastuzumab (Daiichi Sankyo) (2018)<br>Trastuzumab (Pfizer) (2018)                               |

The reference products and biosimilars are expressed as trade names. The bracketed content indicates the year of approval.

Abbreviations: INN, International Nonproprietary Names. FDA, US Food and Drug Administration. EMA, European Medicines Agency. PMDA, Japanese Pharmaceuticals and Medical Devices Agency. NMPA, National Medical Products Administration.

**eTable 4. Biosimilar products approved in China (n=23).**

| Numbers | Biosimilars          |               | Reference drugs |               | Time difference <sup>a</sup> |
|---------|----------------------|---------------|-----------------|---------------|------------------------------|
|         | Names                | Approval date | Names           | Approval date |                              |
| 1       | Rituximab-HLX01      | 2019-02-22    | Rituximab       | 2000-03-15    | 19.0                         |
| 2       | Rituximab-IBI301     | 2020-09-30    |                 |               |                              |
| 3       | Teriparatide-SAL001  | 2019-09-29    | Teriparatide    | 2011-03-04    | 8.6                          |
| 4       | Adalimumab-BAT1406   | 2019-11-04    | Adalimumab      | 2010-02-26    | 9.7                          |
| 5       | Adalimumab-HS016     | 2019-12-06    |                 |               |                              |
| 6       | Adalimumab-IBI303    | 2020-09-02    |                 |               |                              |
| 7       | Adalimumab-HLX03     | 2020-12-02    |                 |               |                              |
| 8       | Adalimumab-TQZ2301   | 2022-01-18    |                 |               |                              |
| 9       | Adalimumab-UBP1211   | 2022-03-01    |                 |               |                              |
| 10      | Bevacizumab-QL1101   | 2019-12-06    | Bevacizumab     | 2010-02-26    | 9.8                          |
| 11      | Bevacizumab-IBI305   | 2020-06-17    |                 |               |                              |
| 12      | Bevacizumab-LY01008  | 2021-04-30    |                 |               |                              |
| 13      | Bevacizumab-BP102    | 2021-06-22    |                 |               |                              |
| 14      | Bevacizumab-BAT1706  | 2021-11-17    |                 |               |                              |
| 15      | Bevacizumab-MIL60    | 2021-11-24    |                 |               |                              |
| 16      | Bevacizumab-TAB008   | 2021-11-30    |                 |               |                              |
| 17      | Bevacizumab-HLX04    | 2021-11-30    |                 |               |                              |
| 18      | Trastuzumab-HL02     | 2020-08-12    | Trastuzumab     | 2002-09-05    | 17.9                         |
| 19      | Infliximab-CMAB008   | 2021-07-12    | Infliximab      | 2006-05-17    | 15.2                         |
| 20      | Infliximab-HS626     | 2021-09-24    |                 |               |                              |
| 21      | Infliximab-GB242     | 2022-02-23    |                 |               |                              |
| 22      | Insulin aspart-HS005 | 2021-09-13    | Insulin aspart  | 2002-08-16    | 19.1                         |
| 23      | Denosumab-LY06006    | 2022-11-08    | Denosumab       | 2019-05-21    | 3.5                          |

<sup>a</sup>Time difference is defined as the duration between the first approved biosimilar and the reference drug.

**eTable 5. The number of approved and in-development oncology biosimilars products in China (As of February 1, 2023)**

| <b>Biosimilars</b> | <b>I phase</b> | <b>III phase</b> | <b>NDA review</b> | <b>Approved</b> |
|--------------------|----------------|------------------|-------------------|-----------------|
| Bevacizumab        | 5              | 9                | 2                 | 8               |
| Rituximab          | 2              | 5                | 2                 | 2               |
| Trastuzumab        | 2              | 7                | 3                 | 1               |

**eTable 6. Demographic and clinical characteristics of the included RCTs (n=39).**

| Number                                        | First Author                      | Year | Clinical trial number | Sponsor              | Country | Study design   | MRCT | Cancer types                                              | Biosimilar  | Originator  | Sex (M/F) | No. Patients in biosimilar | No. Patients in originator | Primary efficacy endpoints (Times) | study duration <sup>a</sup> (month) |
|-----------------------------------------------|-----------------------------------|------|-----------------------|----------------------|---------|----------------|------|-----------------------------------------------------------|-------------|-------------|-----------|----------------------------|----------------------------|------------------------------------|-------------------------------------|
| <b>Bevacizumab biosimilars vs Bevacizumab</b> |                                   |      |                       |                      |         |                |      |                                                           |             |             |           |                            |                            |                                    |                                     |
| 1                                             | Stroyakovskiy et al. <sup>1</sup> | 2022 | NCT01763645           | Biocad               | Russian | equivalence    | Yes  | advanced non-squamous NSCLC                               | BCD-021     | bevacizumab | 230/110   | 212                        | 145                        | ORR (18w)                          | 25.37                               |
| 2                                             | Thatcher et al. <sup>2</sup>      | 2019 | NCT01966003           | Amgen                | US      | equivalence    | Yes  | advanced nonsquamous NSCLC                                | ABP215      | bevacizumab | NA        | 328                        | 314                        | ORR (25w)                          | 20.63                               |
| 3                                             | Reinmuth et al. <sup>3</sup>      | 2019 | NCT02364999           | Pfizer               | US      | equivalence    | Yes  | newly diagnosed Stage IIIB or IV NSCLC                    | PF-06439535 | bevacizumab | 467/252   | 358                        | 361                        | ORR (19w)                          | 25.37                               |
| 4                                             | Reck et al. <sup>4</sup>          | 2020 | NCT02754882           | Samsung              | Korea   | equivalence    | Yes  | metastatic or recurrent NSCLC                             | SB8         | bevacizumab | 508/255   | 379                        | 384                        | ORR (24w)                          | 18.93                               |
| 5                                             | Yang et al. <sup>5</sup>          | 2019 | NCT02954172           | Innovent             | China   | equivalence    | No   | metastatic or recurrent non-squamous NSCLC                | IBI305      | bevacizumab | 279/162   | 224                        | 226                        | ORR (18w)                          | 23.00                               |
| 6                                             | Trukhin et al. <sup>6</sup>       | 2021 | NCT03296163           | mAbxience            | Spain   | equivalence    | Yes  | stage IIIB/IV non-squamous NSCLC                          | MB02        | bevacizumab | 383/244   | 315                        | 312                        | ORR (18w)                          | 17.07                               |
| 7                                             | Rezvani et al. <sup>7</sup>       | 2020 | NCT03288987           | AryoGen              | Iran    | noninferiority | No   | metastatic CRC                                            | BE1040V     | bevacizumab | 91/35     | 82                         | 42                         | PFS (NA)                           | 22.13                               |
| 8                                             | Qin et al. <sup>8</sup>           | 2021 | NCT03511963           | Henlius              | China   | equivalence    | No   | metastatic CRC                                            | HLX04       | bevacizumab | 404/271   | 340                        | 337                        | PFSR (36w)                         | 24.57                               |
| 9                                             | Shi et al. <sup>9</sup>           | 2021 | NCT03533127           | Luye                 | China   | equivalence    | No   | unresectable, metastatic, or recurrent non-squamous NSCLC | LY01008     | bevacizumab | 352/237   | 324                        | 325                        | ORR (18w)                          | 31.47                               |
| 10                                            | Chu et al. <sup>10</sup>          | 2021 | NCT03169335           | Qilu                 | China   | equivalence    | No   | untreated advanced non-squamous NSCLC                     | QL1101      | bevacizumab | 318/217   | 269                        | 266                        | ORR (18w)                          | 15.07                               |
| 11                                            | Hengrui <sup>11</sup> (Sponsor)   | 2022 | NCT05169801           | HengRui              | China   | equivalence    | No   | metastatic or recurrent non-squamous NSCLC                | BP102       | bevacizumab | NA        | 262                        | 255                        | ORR (18w)                          | 21.13                               |
| 12                                            | Wan et al. <sup>12</sup>          | 2021 | NCT03196986           | Mabworks             | China   | equivalence    | No   | metastatic or recurrent non-squamous NSCLC                | MIL60       | bevacizumab | 325/183   | 257                        | 260                        | ORR (12w)                          | 23.87                               |
| 13                                            | Syrgos et al. <sup>13</sup>       | 2021 | NCT02810457           | Centus               | UK      | equivalence    | Yes  | advanced/recurrent non-squamous NSCLC                     | FKB238      | bevacizumab | 483/248   | 364                        | 367                        | ORR (30m)                          | 28.97                               |
| 14                                            | Kim et al. <sup>14</sup>          | 2022 | NCT02272413           | Boehringer Ingelheim | Germany | equivalence    | Yes  | recurrent or metastatic (stage IV) NSCLC                  | BI695502    | bevacizumab | 417/246   | 338                        | 333                        | ORR (18w)                          | 24.10                               |

| Number                                    | First Author                      | Year | Clinical trial number      | Sponsor    | Country     | Study design   | MRCT | Cancer types                                                              | Biosimilar | Originator  | Sex (M/F) | No. Patients in biosimilar | No. Patients in originator | Primary efficacy endpoints (Times) | study duration <sup>a</sup> (month) |
|-------------------------------------------|-----------------------------------|------|----------------------------|------------|-------------|----------------|------|---------------------------------------------------------------------------|------------|-------------|-----------|----------------------------|----------------------------|------------------------------------|-------------------------------------|
| 15                                        | Socinski et al. <sup>15</sup>     | 2021 | EudraCT no. 2015-005141-32 | Mylan GmbH | US          | equivalence    | Yes  | IV unresectable, recurrent, or metastatic NSCLC                           | MYL-14020  | bevacizumab | 424/247   | 337                        | 334                        | ORR (18w)                          | 28.83                               |
| 16                                        | Chen et al. <sup>16</sup>         | 2022 | NCT03329911                | Bio-Thera  | China       | equivalence    | Yes  | advanced nonsquamous NSCLC                                                | BAT1706    | bevacizumab | NA        | 325                        | 326                        | ORR (18w)                          | 24.87                               |
| 17                                        | Lu et al. <sup>17</sup>           | 2023 | NCT05427305                | TOT        | China       | equivalence    | No   | metastatic EGFR wild-type non-squamous NSCLC                              | TAB 008    | bevacizumab | 457/194   | 277                        | 272                        | ORR (18w)                          | 29.53                               |
| 18                                        | Verschraegen et al. <sup>18</sup> | 2022 | NCT03676192                | Celltrion  | Korea       | equivalence    | No   | metastatic or recurrent non-squamous NSCLC.                               | CT-P16     | bevacizumab | 397/149   | 342                        | 347                        | ORR (21w)                          | 28.50                               |
| <b>Rituximab biosimilars vs Rituximab</b> |                                   |      |                            |            |             |                |      |                                                                           |            |             |           |                            |                            |                                    |                                     |
| 1                                         | Kaplanov et al. <sup>19</sup>     | 2014 | NA                         | Biocad     | Russia      | noninferiority | Yes  | B-Cell Non-Hodgkin's Lymphoma/follicular non-Hodgkin's lymphoma           | BCD-020    | rituximab   | NA        | 46                         | 46                         | ORR (NA)                           | 23.73                               |
| 2                                         | Toogeh et al. <sup>20</sup>       | 2018 | IRCT201305296302N5         | AryoGen    | Iran        | noninferiority | No   | untreated or recurrent B-CLL                                              | Zytux      | rituximab   | 57/13     | 35                         | 35                         | ORR (NA)                           | 8.00                                |
| 3                                         | Jurczak et al. <sup>21</sup>      | 2017 | NCT01419665                | Sandoz     | Switzerland | equivalence    | Yes  | untreated, advanced stage (Ann Arbor stage III or IV) follicular lymphoma | GP2013     | rituximab   | 277/350   | 314                        | 315                        | ORR (21w)                          | 43.90                               |
| 4                                         | Kim et al. <sup>22</sup>          | 2017 | NCT02162771                | Celltrion  | Korea       | noninferiority | No   | newly diagnosed advancedstage follicular lymphoma                         | CT-P10     | rituximab   | 63/77     | 70                         | 70                         | ORR (24w)                          | 18.23                               |
| 5                                         | Ogura et al. <sup>23</sup>        | 2018 | NCT02260804                | Celltrion  | Korea       | equivalence    | No   | untreated low-tumour-burden follicular lymphoma                           | CT-P10     | rituximab   | 123/145   | 130                        | 128                        | ORR (7m)                           | 26.23                               |
| 6                                         | Poddunaya et al. <sup>24</sup>    | 2020 | NCT01701232                | Biocad     | Russia      | equivalence    | Yes  | indolent non-Hodgkin lymphomas                                            | BCD-020    | rituximab   | 84/90     | 89                         | 85                         | ORR (4w)                           | 64.97                               |

| Number                                        | First Author                       | Year | Clinical trial number         | Sponsor    | Country | Study design   | MRCT | Cancer types                                                                                | Biosimilar  | Originator  | Sex (M/F) | No. Patients in biosimilar | No. Patients in originator | Primary efficacy endpoints (Times) | study duration <sup>a</sup> (month) |
|-----------------------------------------------|------------------------------------|------|-------------------------------|------------|---------|----------------|------|---------------------------------------------------------------------------------------------|-------------|-------------|-----------|----------------------------|----------------------------|------------------------------------|-------------------------------------|
| 7                                             | Candelaria et al. <sup>25</sup>    | 2019 | NCT02268045                   | mAbxience  | Spain   | noninferiority | Yes  | DLBCL with untreated CD20p, at stage I (only with bulky disease) or stages II to IV disease | RTXM83      | rituximab   | 155/117   | 136                        | 136                        | ORR (18w)                          | 36.53                               |
| 8                                             | Sharman et al. <sup>26</sup>       | 2020 | NCT02213263                   | Pfizer     | US      | equivalence    | Yes  | Low Tumor Burden, Follicular Lymphoma                                                       | PF-05280586 | rituximab   | 178/216   | 196                        | 198                        | ORR (26w)                          | 37.30                               |
| 9                                             | Niederwieser et al. <sup>27</sup>  | 2020 | NCT02747043                   | Amgen      | US      | equivalence    | Yes  | Follicular Lymphoma                                                                         | ABP 798     | rituximab   | 130/126   | 128                        | 128                        | ORR (28w)                          | 37.63                               |
| 10                                            | Archigen <sup>28</sup> (Sponsor)   | 2020 | NCT02809053                   | Archigen   | Korea   | equivalence    | Yes  | patients with low Tumor Burden Follicular lymphoma                                          | SAIT101     | rituximab   | 141/174   | 157                        | 158                        | ORR (28w)                          | 30.33                               |
| 11                                            | Shi et al. <sup>29</sup>           | 2020 | NCT02787239; CTR20150583      | Henlius    | China   | equivalence    | No   | treatment-naïve, CD20-positive DLBCL                                                        | HLX01       | rituximab   | 220/182   | 201                        | 206                        | ORR (18w)                          | 31.43                               |
| 12                                            | Song et al. <sup>30</sup>          | 2021 | NCT02867566                   | Innovent   | China   | equivalence    | No   | untreated CD20 DLBCL                                                                        | IBI301      | rituximab   | 214/202   | 209                        | 210                        | ORR (18w)                          | 36.97                               |
| <b>Trastuzumab biosimilars vs Trastuzumab</b> |                                    |      |                               |            |         |                |      |                                                                                             |             |             |           |                            |                            |                                    |                                     |
| 1                                             | Stebbing et al. <sup>31</sup>      | 2017 | NCT02162667                   | Celltrion  | Korea   | equivalence    | Yes  | neoadjuvant treatment of HER2-positive early-stage breast cancer.                           | CT-P6       | trastuzumab | 0/549     | 271                        | 278                        | pCR (30w)                          | 24.17                               |
| 2                                             | Rugo et al. <sup>32</sup>          | 2017 | NCT02472964                   | Mylan Inc. | UK      | equivalence    | Yes  | ERBB2 (HER2)-Positive Metastatic Breast Cancer                                              | MYL-14010   | trastuzumab | 0/528     | 250                        | 250                        | ORR (24w)                          | 44.63                               |
| 3                                             | Von Minckwitz et al. <sup>33</sup> | 2018 | NCT01901146/CT 2012-004319-29 | Amgen      | US      | equivalent     | Yes  | Early BC                                                                                    | ABP 980     | trastuzumab | 0/725     | 364                        | 361                        | pCR (7w)                           | 36.73                               |
| 4                                             | Pivot et al. <sup>34</sup>         | 2018 | NCT02149524                   | Samsung    | Korea   | equivalence    | No   | Early BC                                                                                    | SB3         | trastuzumab | 0/875     | 437                        | 438                        | pCR (24w)                          | 23.33                               |
| 5                                             | Pegram et al. <sup>35</sup>        | 2019 | NCT01989676                   | Pfizer     | US      | equivalence    | Yes  | HER2-positive metastatic breast cancer                                                      | PF-05280014 | trastuzumab | 0/707     | 352                        | 355                        | ORR (25w)                          | 30.40                               |



| Number | First Author                 | Year | Clinical trial number                                     | Sponsor  | Country   | Study design   | MRCT | Cancer types                                              | Biosimilar | Originator  | Sex (M/F) | No. Patients in biosimilar | No. Patients in originator | Primary efficacy endpoints (Times) | study duration <sup>a</sup> (month) |
|--------|------------------------------|------|-----------------------------------------------------------|----------|-----------|----------------|------|-----------------------------------------------------------|------------|-------------|-----------|----------------------------|----------------------------|------------------------------------|-------------------------------------|
| 6      | Pivot et al. <sup>36</sup>   | 2022 | NCT03013504                                               | Prestige | Singapore | equivalence    | Yes  | ERBB2-positive early breast cancer                        | HD201      | trastuzumab | 0/502     | 251                        | 251                        | pCR (24w)                          | 14.13                               |
| 7      | Alexeev et al. <sup>37</sup> | 2020 | NCT01764022                                               | Biocad   | Russian   | equivalence    | Yes  | metastatic HER2(+) breast cancer                          | BCD-022    | trastuzumab | 0/225     | 115                        | 110                        | ORR (18w)                          | 29.37                               |
| 8      | Xu et al. <sup>38</sup>      | 2021 | NCT03084237;<br>EudraCT<br>2016-000206-10;<br>CTR20160526 | Henlius  | China     | equivalence    | Yes  | Recurrent or Metastatic<br>HER2-Positive breast<br>cancer | HLX02      | trastuzumab | 0/649     | 324                        | 325                        | ORR (24w)                          | 24.17                               |
| 9      | Nodehi et al. <sup>39</sup>  | 2022 | NCT03425656                                               | AryoGen  | Iran      | noninferiority | No   | HER2-positive early-stage<br>breast cancer patients       | TA4415V    | trastuzumab | 0/92      | 48                         | 44                         | pCR (23w)                          | 20.17                               |

<sup>a</sup>Study duration is defined as the period from the date of first enrolled patient to cut-off date of primary analysis. The median duration for assessing the primary efficacy endpoints of bevacizumab biosimilars, rituximab biosimilars, and trastuzumab biosimilars was 18 weeks, 23 weeks, and 24 weeks, respectively.

Abbreviations: NA, not available; ORR, objective response rate; pCR, pathologic complete response; PFS, progression-free survival; PFSR, progression-free survival rate; MRCT, multi-regional clinical trial; Early BC, early breast cancer; w, week.

**eTable 7. Demographic and clinical characteristics of the included cohort studies (n=10).**

| First Author                         | Year | Trial design                          | Country | Sex(M/F) | Cancer types                                    | Biosimilar | Originator  | No. Patients in biosimilar | No. Patients in originator | Primary efficacy endpoints | study duration <sup>a</sup> (month) |
|--------------------------------------|------|---------------------------------------|---------|----------|-------------------------------------------------|------------|-------------|----------------------------|----------------------------|----------------------------|-------------------------------------|
| <b>Rituximab</b>                     |      |                                       |         |          |                                                 |            |             |                            |                            |                            |                                     |
| Roy et al. <sup>40</sup>             | 2013 | retrospective analysis                | India   | 156/67   | diffuse large B-cEII lymphoma                   | Reditux    | Rituximab   | 72                         | 101                        | NA                         | 79.07                               |
| Bankar et al. <sup>41</sup>          | 2020 | retrospective analysis                | India   | 111/41   | diffuse large B-cEII lymphoma                   | Reditux    | Rituximab   | 92                         | 60                         | NA                         | 48.67                               |
| Deng et al. <sup>42</sup>            | 2022 | retrospective analysis                | China   | 20/13    | diffuse large B-cEII lymphoma                   | HLX-01     | Rituximab   | 15                         | 18                         | NA                         | 26.30                               |
| <b>Bevacizumab</b>                   |      |                                       |         |          |                                                 |            |             |                            |                            |                            |                                     |
| Zhao et al. <sup>43</sup>            | 2022 | retrospective analysis                | China   | 533/413  | advanced non-small-cell lung cancer             | QL1101     | Bevacizumab | 551                        | 395                        | ORR                        | 35.47                               |
| <b>Trastuzumab</b>                   |      |                                       |         |          |                                                 |            |             |                            |                            |                            |                                     |
| Bae et al. <sup>44</sup>             | 2021 | retrospective analysis                | Korea   | NA       | Early-stage and metastatic breast cancer        | CT-P6      | Trastuzumab | 125                        | 129                        | pCR & PFS                  | 69.00                               |
| Park et al. <sup>45</sup>            | 2022 | retrospective analysis                | Korea   | NA       | advanced gastric Cancer                         | CT-P6      | Trastuzumab | 30                         | 72                         | NA                         | 120.70                              |
| Yang et al. <sup>46</sup>            | 2022 | retrospective analysis                | Canada  | 20/13    | early breast cancer w/ neoadjuvant chemotherapy | MYL-1401 O | Trastuzumab | 59                         | 77                         | pCR                        | 12.13                               |
| Bernat-Peguer a et al. <sup>47</sup> | 2022 | retrospective analysis                | Spain   | NA       | early breast cancer                             | CT-P6      | Trastuzumab | 20                         | 24                         | NA                         | 48.67                               |
| Eser et al. <sup>48</sup>            | 2023 | real-world use/retrospective analysis | Turkey  | NA       | early and metastatic breast cancer              | MYL-1401 O | Trastuzumab | 25                         | 28                         | pCR and PFS                | 42.53                               |
| Liu et al. <sup>49</sup>             | 2022 | retrospective analysis                | China   | 105/0    | early breast cancer                             | HLX02      | Trastuzumab | 65                         | 40                         | NA                         | 9.07                                |

<sup>a</sup>Study duration is defined as the period from the period of participants will be followed and observed to assess the occurrence of specific outcomes. Abbreviations: NA, not available; ORR, objective response rate; pCR, pathologic complete response; PFS, progression-free survival.

**eTable 8. The results of the risk of bias assessment of the RCTs based on the Cochrane Collaboration's tools.**

| First Author                                  | Year | Random sequence generation (selection bias) | Allocation concealment (selection bias) | Blinding of participants and personnel (performance bias) | Blinding of outcome assessors (performance bias) | Incomplete outcome data (attrition bias) | Selective outcome reporting (reporting bias) | Other potential bias | Overall assessment: risk of bias |
|-----------------------------------------------|------|---------------------------------------------|-----------------------------------------|-----------------------------------------------------------|--------------------------------------------------|------------------------------------------|----------------------------------------------|----------------------|----------------------------------|
| <b>Bevacizumab biosimilars vs Bevacizumab</b> |      |                                             |                                         |                                                           |                                                  |                                          |                                              |                      |                                  |
| Stroyakovskiy et al. <sup>1</sup>             | 2022 | +                                           | +                                       | +                                                         | +                                                | +                                        | +                                            | +                    | low                              |
| Thatcher et al. <sup>2</sup>                  | 2019 | +                                           | +                                       | +                                                         | +                                                | +                                        | +                                            | +                    | low                              |
| Reinmuth et al. <sup>3</sup>                  | 2019 | +                                           | +                                       | +                                                         | —                                                | +                                        | +                                            | +                    | low                              |
| Reck et al. <sup>4</sup>                      | 2020 | +                                           | +                                       | +                                                         | +                                                | —                                        | +                                            | +                    | low                              |
| Yang et al. <sup>5</sup>                      | 2019 | +                                           | +                                       | +                                                         | +                                                | +                                        | +                                            | +                    | low                              |
| Trukhin et al. <sup>6</sup>                   | 2021 | +                                           | +                                       | +                                                         | +                                                | +                                        | +                                            | +                    | low                              |
| Rezvani et al. <sup>7</sup>                   | 2020 | +                                           | +                                       | +                                                         | +                                                | +                                        | +                                            | +                    | low                              |
| Qin et al. <sup>8</sup>                       | 2021 | +                                           | +                                       | +                                                         | +                                                | +                                        | +                                            | +                    | low                              |
| Shi et al. <sup>9</sup>                       | 2021 | +                                           | +                                       | +                                                         | —                                                | +                                        | +                                            | +                    | low                              |
| Chu et al. <sup>10</sup>                      | 2021 | +                                           | +                                       | +                                                         | ?                                                | —                                        | +                                            | +                    | unclear                          |
| Hengrui <sup>11</sup> (Sponsor)               | 2022 | ?                                           | +                                       | +                                                         | +                                                | +                                        | +                                            | +                    | low                              |
| Wan et al. <sup>12</sup>                      | 2021 | +                                           | +                                       | +                                                         | +                                                | +                                        | +                                            | +                    | low                              |
| Syrgos et al. <sup>13</sup>                   | 2021 | +                                           | +                                       | +                                                         | +                                                | +                                        | +                                            | +                    | low                              |
| Kim et al. <sup>14</sup>                      | 2021 | +                                           | +                                       | +                                                         | +                                                | —                                        | +                                            | +                    | low                              |
| Socinski et al. <sup>15</sup>                 | 2021 | ?                                           | ?                                       | +                                                         | +                                                | +                                        | +                                            | +                    | unclear                          |
| Chen et al. <sup>16</sup>                     | 2022 | ?                                           | +                                       | +                                                         | ?                                                | +                                        | +                                            | +                    | unclear                          |

| First Author                                  | Year | Random sequence generation (selection bias) | Allocation concealment (selection bias) | Blinding of participants and personnel (performance bias) | Blinding of outcome assessors (performance bias) | Incomplete outcome data (attrition bias) | Selective outcome reporting (reporting bias) | Other potential bias | Overall assessment: risk of bias |
|-----------------------------------------------|------|---------------------------------------------|-----------------------------------------|-----------------------------------------------------------|--------------------------------------------------|------------------------------------------|----------------------------------------------|----------------------|----------------------------------|
| Lu et al. <sup>17</sup>                       | 2023 | +                                           | +                                       | +                                                         | +                                                | —                                        | +                                            | +                    | low                              |
| Verschraegen et al. <sup>18</sup>             | 2022 | +                                           | +                                       | +                                                         | +                                                | +                                        | +                                            | +                    | low                              |
| <b>Rituximab biosimilars vs Rituximab</b>     |      |                                             |                                         |                                                           |                                                  |                                          |                                              |                      |                                  |
| Kaplanov et al. <sup>19</sup>                 | 2014 | +                                           | +                                       | —                                                         | —                                                | —                                        | +                                            | +                    | high                             |
| Toogeh et al. <sup>20</sup>                   | 2018 | +                                           | +                                       | +                                                         | +                                                | +                                        | +                                            | +                    | low                              |
| Jurczak et al. <sup>21</sup>                  | 2017 | +                                           | +                                       | +                                                         | +                                                | +                                        | +                                            | +                    | low                              |
| Kim et al. <sup>22</sup>                      | 2017 | +                                           | +                                       | +                                                         | +                                                | +                                        | +                                            | +                    | low                              |
| Ogura et al. <sup>23</sup>                    | 2018 | +                                           | +                                       | +                                                         | +                                                | +                                        | +                                            | +                    | low                              |
| Poddunaya et al. <sup>24</sup>                | 2020 | +                                           | +                                       | —                                                         | —                                                | +                                        | +                                            | +                    | high                             |
| Candelaria et al. <sup>25</sup>               | 2019 | +                                           | +                                       | +                                                         | +                                                | +                                        | +                                            | +                    | low                              |
| Sharman et al. <sup>26</sup>                  | 2020 | +                                           | +                                       | +                                                         | ?                                                | +                                        | +                                            | +                    | low                              |
| Niederwieser et al. <sup>27</sup>             | 2020 | +                                           | +                                       | +                                                         | +                                                | +                                        | +                                            | +                    | low                              |
| Archigen <sup>28</sup> (Sponsor)              | 2020 | ?                                           | +                                       | +                                                         | +                                                | +                                        | +                                            | +                    | low                              |
| Shi et al. <sup>29</sup>                      | 2020 | ?                                           | +                                       | +                                                         | ?                                                | +                                        | +                                            | +                    | unclear                          |
| Song et al. <sup>30</sup>                     | 2021 | +                                           | +                                       | +                                                         | +                                                | +                                        | +                                            | +                    | low                              |
| <b>Trastuzumab biosimilars vs Trastuzumab</b> |      |                                             |                                         |                                                           |                                                  |                                          |                                              |                      |                                  |
| Stebbing et al. <sup>31</sup>                 | 2017 | +                                           | +                                       | +                                                         | +                                                | +                                        | +                                            | +                    | low                              |

| First Author                       | Year | Random sequence generation (selection bias) | Allocation concealment (selection bias) | Blinding of participants and personnel (performance bias) | Blinding of outcome assessors (performance bias) | Incomplete outcome data (attrition bias) | Selective outcome reporting (reporting bias) | Other potential bias | Overall assessment: risk of bias |
|------------------------------------|------|---------------------------------------------|-----------------------------------------|-----------------------------------------------------------|--------------------------------------------------|------------------------------------------|----------------------------------------------|----------------------|----------------------------------|
| Rugo et al. <sup>32</sup>          | 2017 | +                                           | +                                       | +                                                         | +                                                | +                                        | +                                            | +                    | low                              |
| von Minckwitz et al. <sup>33</sup> | 2018 | +                                           | +                                       | +                                                         | +                                                | +                                        | +                                            | +                    | low                              |
| Pivot et al. <sup>34</sup>         | 2018 | +                                           | +                                       | +                                                         | ?                                                | +                                        | +                                            | +                    | low                              |
| Pegram et al. <sup>35</sup>        | 2019 | +                                           | +                                       | +                                                         | +                                                | +                                        | +                                            | +                    | low                              |
| Pivot et al. <sup>36</sup>         | 2022 | +                                           | +                                       | +                                                         | ?                                                | ?                                        | +                                            | +                    | unclear                          |
| Alexeev et al. <sup>37</sup>       | 2020 | +                                           | +                                       | +                                                         | +                                                | +                                        | +                                            | +                    | low                              |
| Xu et al. <sup>38</sup>            | 2021 | +                                           | +                                       | +                                                         | +                                                | +                                        | +                                            | +                    | low                              |
| Nodehi et al. <sup>39</sup>        | 2022 | ?                                           | +                                       | +                                                         | +                                                | +                                        | +                                            | +                    | low                              |

The green, yellow and red color indicates low risk, unclear and high risk of bias, respectively.

**eTable 9. The results of the risk of bias assessment of the cohort studies based on the Newcastle-Ottawa Risk of Bias Assessment Tool.**

| First Author                        | Year | Representativeness of the exposed cohort | Selection of the non-exposed cohort | Ascertainment of exposure | Demonstration that outcome of interest was not present at baseline | Comparability of cohorts on the basis of the design or analysis | Assessment of outcomes | Was follow-up long enough for outcomes occur | Adequacy of follow up of cohorts | Total scores <sup>a</sup> (risk of bias) |
|-------------------------------------|------|------------------------------------------|-------------------------------------|---------------------------|--------------------------------------------------------------------|-----------------------------------------------------------------|------------------------|----------------------------------------------|----------------------------------|------------------------------------------|
| Roy et al. <sup>40</sup>            | 2013 | 1                                        | 1                                   | 1                         | 1                                                                  | 0                                                               | 1                      | 1                                            | 1                                | 7 (low)                                  |
| Bankar et al. <sup>41</sup>         | 2020 | 1                                        | 1                                   | 1                         | 1                                                                  | 1                                                               | 1                      | 1                                            | 0                                | 7 (low)                                  |
| Deng et al. <sup>42</sup>           | 2022 | 1                                        | 1                                   | 1                         | 1                                                                  | 1                                                               | 1                      | 0                                            | 0                                | 6 (high)                                 |
| Zhao et al. <sup>43</sup>           | 2023 | 1                                        | 1                                   | 1                         | 1                                                                  | 2                                                               | 1                      | 0                                            | 0                                | 7 (low)                                  |
| Bae et al. <sup>44</sup>            | 2021 | 1                                        | 1                                   | 1                         | 1                                                                  | 2                                                               | 1                      | 1                                            | 0                                | 8 (low)                                  |
| Park et al. <sup>45</sup>           | 2022 | 1                                        | 1                                   | 1                         | 1                                                                  | 1                                                               | 1                      | 0                                            | 0                                | 6 (high)                                 |
| Yang et al. <sup>46</sup>           | 2022 | 1                                        | 1                                   | 1                         | 1                                                                  | 1                                                               | 0                      | 0                                            | 0                                | 5 (high)                                 |
| Bernat-Peguera et al. <sup>47</sup> | 2022 | 1                                        | 1                                   | 1                         | 1                                                                  | 1                                                               | 1                      | 0                                            | 0                                | 6 (high)                                 |
| Eser et al. <sup>48</sup>           | 2023 | 1                                        | 1                                   | 1                         | 1                                                                  | 2                                                               | 1                      | 0                                            | 0                                | 7 (low)                                  |
| Liu et al. <sup>49</sup>            | 2022 | 1                                        | 1                                   | 1                         | 1                                                                  | 2                                                               | 1                      | 0                                            | 0                                | 7 (low)                                  |

The green, yellow and red colours indicates low risk, some concerns and high risk of bias, respectively; <sup>a</sup>Total scores (risk of bias): scoring from 7-9: high quality; Scoring from 4-6: high risk of bias; Scoring from 0-3: very high risk of bias.

**eTable 10. Characteristics of pivotal clinical trials used to support approval of cancer biosimilars by the NMPA, FDA, EMA, and PMDA.**

| Regulatory Agencies            | Brand name              | Clinical trial number      | Study design | Margin criterion                                     | Cancer types | Biosimilar  | Originator  | No. Patients in biosimilar | No. Patients in originator | Primary efficacy endpoints (Times) |
|--------------------------------|-------------------------|----------------------------|--------------|------------------------------------------------------|--------------|-------------|-------------|----------------------------|----------------------------|------------------------------------|
| <b>Bevacizumab biosimilars</b> |                         |                            |              |                                                      |              |             |             |                            |                            |                                    |
| FDA/EMA/PMDA                   | Mvasi/Bevacizumab BS    | NCT01966003                | equivalence  | RR=90%CI (0.67, 1.50)                                | NSCLC        | ABP215      | bevacizumab | 328                        | 314                        | ORR (25w)                          |
| FDA/EMA/PMDA                   | Zirabev/Bevacizumab BS  | NCT02364999                | equivalence  | RR=90%CI (0.73, 1.37)                                | NSCLC        | PF-06439535 | bevacizumab | 358                        | 361                        | ORR (19w)                          |
| FDA/EMA/PMDA                   | Vegzelma/Bevacizumab BS | NCT03676192                | equivalence  | RR=90%CI (0.73,1.36);<br>RD=95%CI(-12.5%, 12.5%)     | NSCLC        | CT-P16      | bevacizumab | 342                        | 347                        | ORR (21w)                          |
| FDA/EMA/PMDA                   | Alymsys/Bevacizumab BS  | NCT03296163                | equivalence  | RR=90%CI (0.73,1.36);<br>RD=(-12%, 12%)              | NSCLC        | MB02        | bevacizumab | 315                        | 312                        | ORR (18w)                          |
| EMA                            | Aybintio                | NCT02754882                | equivalence  | RR=90%CI (0.74,1.36);<br>RD=95%CI(-12.5%, 12.5%)     | NSCLC        | SB8         | bevacizumab | 379                        | 384                        | ORR (24w)                          |
| EMA                            | Equidacent (withdrawal) | NCT02810457                | equivalence  | RR=90%CI (0.73, 1.38);<br>RD=95%CI (-12.21%, 12.21%) | NSCLC        | FKB238      | bevacizumab | 364                        | 367                        | ORR (30m)                          |
| EMA                            | Abevmy                  | EudraCT no. 2015-005141-32 | equivalence  | RR=90%CI (0.73, 1.36);<br>RD=95%CI(-12.5%, 12.5%)    | NSCLC        | MYL-14020   | bevacizumab | 337                        | 334                        | ORR (18w)                          |
| NMPA                           | Dayoutong               | NCT02954172                | equivalence  | RR=90%CI (0.75,1.33)                                 | NSCLC        | IBI305      | bevacizumab | 224                        | 226                        | ORR (18w)                          |
| NMPA                           | Hanbeitai               | NCT03511963                | equivalence  | RR=90%CI (0.8, 1.25);<br>RD=95%CI (-11%, 15%)        | mCRC         | HLX04       | bevacizumab | 340                        | 337                        | PFSR (36w)                         |
| NMPA                           | Boyounuo                | NCT03533127                | equivalence  | RR=90%CI (0.75, 1.33)                                | NSCLC        | LY01008     | bevacizumab | 324                        | 325                        | ORR (18w)                          |
| NMPA                           | Ankeda                  | NCT03169335                | equivalence  | RR=90%CI (0.75, 1.33)                                | NSCLC        | QL1101      | bevacizumab | 269                        | 266                        | ORR (18w)                          |
| NMPA                           | Airuituo                | NCT05169801                | equivalence  | RR=90%CI (0.75, 1.33)                                | NSCLC        | BP102       | bevacizumab | 262                        | 255                        | ORR (18w)                          |
| NMPA                           | Beiianting              | NCT03196986                | equivalence  | RR=90%CI (0.75, 1.33)                                | NSCLC        | MIL60       | bevacizumab | 257                        | 260                        | ORR (12w)                          |
| NMPA                           | Pubeixi                 | NCT03329911                | equivalence  | RR=90%CI (0.75, 1.33)                                | NSCLC        | BAT1706     | bevacizumab | 325                        | 326                        | ORR (18w)                          |
| NMPA                           | Puxinting               | NCT05427305                | equivalence  | RR=90%CI (0.75, 1.33)                                | NSCLC        | TAB 008     | bevacizumab | 277                        | 272                        | ORR (18w)                          |

| Rituximab biosimilars   |                                |                                                           |                |                                                               |          |             |             |     |     |           |
|-------------------------|--------------------------------|-----------------------------------------------------------|----------------|---------------------------------------------------------------|----------|-------------|-------------|-----|-----|-----------|
| FDA/EMA/PMDA            | Ruxience/Rituximab biosimilar  | NCT02213263                                               | equivalence    | RD=95%CI (-16%, 16%)                                          | FL       | PF-05280587 | rituximab   | 196 | 198 | ORR (27w) |
| FDA                     | Truxima                        | NCT02260804                                               | equivalence    | RD=90%CI (-17%, 17%)                                          | FL       | CT-P10      | rituximab   | 130 | 128 | ORR (7m)  |
| FDA/EMA                 | Riabni                         | NCT02747043                                               | noninferiority | RD=90%CI (-15%, 35.5%)                                        | FL       | ABP 798     | rituximab   | 128 | 128 | ORR (28w) |
| EMA                     | Truxima                        | NCT02162771                                               | noninferiority | one-sided 97.5% CI lay on the positive side of the -7% margin | FL       | CT-P10      | rituximab   | 70  | 70  | ORR (24w) |
| PMDA                    | Rituximab biosimilar           | NCT01419665                                               | equivalence    | RD=95%CI (-12%, 12%)                                          | FL       | GP2013      | rituximab   | 314 | 315 | ORR (21w) |
| NMPA                    | Hanlikang                      | NCT02787239;<br>CTR20150583                               | equivalence    | RD=95%CI (-12%, 12%)                                          | DLBCL    | HLX01       | rituximab   | 201 | 206 | ORR (18w) |
| NMPA                    | Dabohua                        | NCT02867566                                               | equivalence    | RD=95%CI (-12%, 12%)                                          | DLBCL    | IBI301      | rituximab   | 209 | 210 | ORR (18w) |
| Trastuzumab biosimilars |                                |                                                           |                |                                                               |          |             |             |     |     |           |
| FDA/EMA/PMDA            | Herzuma/Rituximab biosimilar   | NCT02162667                                               | equivalence    | RD=95%CI (-15%, 15%)                                          | Early BC | CT-P6       | trastuzumab | 271 | 278 | pCR (30w) |
| FDA/EMA                 | Ogivri                         | NCT02472964                                               | equivalence    | RD=95%CI (-15%, 15%)                                          | mBC      | MYL-14010   | trastuzumab | 250 | 250 | ORR (24w) |
| FDA/EMA/PMDA            | Kanjinti/Rituximab biosimilar  | NCT01901146/CT<br>2012-004319-29                          | equivalence    | RD=90%CI (-13%, 13%);<br>RR=90%CI (0.759, 1.318)              | Early BC | ABP 980     | trastuzumab | 364 | 361 | pCR (7w)  |
| FDA/EMA                 | Ontruzant                      | NCT02149524                                               | equivalence    | RD=95%CI(-13%, 13%);<br>RR=95%CI (0.785, 1.546)               | Early BC | SB3         | trastuzumab | 437 | 438 | pCR (24w) |
| FDA/EMA/PMDA            | Trazimera/Rituximab biosimilar | NCT01989676                                               | equivalence    | RR=95%CI (0.80, 1.25)                                         | mBC      | PF-05280014 | trastuzumab | 352 | 355 | ORR (25w) |
| EMA/NMPA                | Hanquyou                       | NCT03084237;<br>EudraCT<br>2016-000206-10;<br>CTR20160526 | equivalence    | RD=95%CI (-13.5%, 13.5%)                                      | mBC      | HLX02       | trastuzumab | 324 | 325 | ORR (24w) |

Abbreviations: NA, not available; ORR, objective response rate; pCR, pathologic complete response; PFS, progression-free survival; NSCLC, non-small cell lung cancer; FL, follicular lymphoma; DLBCL, diffuse large B-cell lymphoma; Early BC, early breast cancer; mBC, metastatic breast cancer; FDA, US Food and Drug Administration; EMA, European Medicines Agency; PMDA, Japanese Pharmaceuticals and Medical Devices Agency; NMPA, National Medical Products Administration. RR, risk ratio; RD, risk difference; w, week; m, month.



**eTable 11. Subgroup analysis of cancer biosimilars compared with reference drugs derived from randomized clinical trials.**

| Variables                                        | Number of studies | Model  | Heterogeneity      | Outcomes          | P value <sup>a</sup> |
|--------------------------------------------------|-------------------|--------|--------------------|-------------------|----------------------|
|                                                  |                   |        | I <sup>2</sup> (%) | RR (95% CI)       |                      |
| <b>Bevacizumab versus bevacizumab biosimilar</b> |                   |        |                    |                   |                      |
| <b>Stage of NSCLC</b>                            |                   |        |                    |                   |                      |
| IIIb /IV stage                                   | 4                 | Random | 0                  | 0.97 (0.93, 1.01) | 0.0969               |
| Others                                           | 12                | Random | 0                  | 0.99 (0.95, 1.04) |                      |
| <b>Country of the sponsor</b>                    |                   |        |                    |                   |                      |
| China                                            | 7                 | Random | 0                  | 0.98 (0.92, 1.04) | 0.165                |
| The United States                                | 3                 | Random | 0                  | 0.96 (0.87, 1.07) |                      |
| European Union                                   | 3                 | Random | 0                  | 0.91 (0.83, 0.99) |                      |
| Others                                           | 3                 | Random | 0                  | 1.06 (0.95, 1.18) |                      |
| <b>Number of included patients</b>               |                   |        |                    |                   |                      |
| n≤500                                            | 2                 | Random | 0                  | 0.98 (0.83,1.16)  | 0.953                |
| n>500                                            | 14                | Random | 0                  | 0.97 (0.93,1.01)  |                      |
| <b>Rituximab versus rituximab biosimilar</b>     |                   |        |                    |                   |                      |
| <b>Cancer type</b>                               |                   |        |                    |                   |                      |
| Follicular Lymphoma                              | 7                 | Random | 0                  | 1.02 (0.98, 1.06) | 0.762                |
| Chronic Lymphocytic Leukemia                     | 1                 | Random | NA                 | 0.99 (0.81, 1.22) |                      |
| Diffuse large B cell lymphoma                    | 3                 | Random | 91                 | 1.07 (0.93, 1.24) |                      |
| Indolent NHL                                     | 1                 | Random | NA                 | 1.03 (0.93, 1.24) |                      |
| <b>Country of the sponsor</b>                    |                   |        |                    |                   |                      |
| China                                            | 2                 | Random | 52                 | 0.99 (0.93, 1.04) | 0.345                |
| The United States                                | 2                 | Random | 0                  | 1.09 (0.99, 1.19) |                      |
| European Union                                   | 3                 | Random | 0                  | 1.00 (0.95, 1.05) |                      |
| Others                                           | 5                 | Random | 0                  | 1.02 (0.96,1.08)  |                      |
| <b>Number of included patients</b>               |                   |        |                    |                   |                      |
| n≤300                                            | 7                 | Random | 0                  | 1.04 (0.98, 1.09) | 0.137                |
| n>300                                            | 5                 | Random | 4                  | 0.99 (0.96, 1.02) |                      |
| <b>Trastuzumab versus trastuzumab biosimilar</b> |                   |        |                    |                   |                      |
| <b>Cancer stage</b>                              |                   |        |                    |                   |                      |
| Early BC                                         | 5                 | Random | 68                 | 1.07 (0.91, 1.24) | 0.522                |
| mBC                                              | 5                 | Random | 0                  | 1.01 (0.95, 1.07) |                      |
| <b>Country of the sponsor</b>                    |                   |        |                    |                   |                      |
| China                                            | 1                 | Random | NA                 | 1.04 (0.96, 1.10) | 0.0213               |
| The United States                                | 2                 | Random | 0                  | 1.22 (1.06, 1.41) |                      |
| European Union                                   | 2                 | Random | 66                 | 1.07 (0.91, 1.27) |                      |
| Others                                           | 4                 | Random | 19                 | 0.98 (0.90,1.06)  |                      |
| <b>Number of included patients</b>               |                   |        |                    |                   |                      |
| n≤600                                            | 5                 | Random | 45                 | 1.02 (0.94, 1.10) | 0.440                |
| n>600                                            | 5                 | Random | 45                 | 1.09 (0.92, 1.29) |                      |

<sup>a</sup>P value indicates a comparison between different subgroups. RR, response rate; CI, confidence interval. FL, follicular lymphoma; CLL, chronic lymphocytic leukemia; DLBCL, diffuse large B cell lymphoma; Indolent NHL, indolent non-Hodgkin lymphomas; Early BC, early breast cancer; mBC, metastatic breast cancer; NSCLC, non-small cell lung cancer; NA, not available.

**eTable 12. Pooled analysis of efficacy (secondary end points), safety, and immunogenicity of cancer biosimilars derived from randomized clinical trials.**

| Outcome and cancer subgroup                   | RCTs, No. | Sample size, No. |           | Test of heterogeneity |         | Results of meta-analysis, effect estimates (95% CI) | P value <sup>a</sup> |
|-----------------------------------------------|-----------|------------------|-----------|-----------------------|---------|-----------------------------------------------------|----------------------|
|                                               |           | Biosimilar       | Reference | I <sup>2</sup> , %    | P value |                                                     |                      |
| <b>Bevacizumab biosimilar vs. Bevacizumab</b> |           |                  |           |                       |         |                                                     |                      |
| <b>Secondary efficacy endpoints</b>           |           |                  |           |                       |         |                                                     |                      |
| OS (HR)                                       | 11        | 3044             | 3011      | 21                    | 0.25    | 1.02 (0.94, 1.11)                                   | 0.51                 |
| PFS (HR)                                      | 10        | 3239             | 3239      | 10                    | 0.35    | 1.03 (0.97, 1.10)                                   | 0.30                 |
| <b>Safety outcome</b>                         |           |                  |           |                       |         |                                                     |                      |
| SAE                                           | 16        | 4692             | 4567      | 0                     | 0.99    | 1.04 (0.97, 1.11)                                   | 0.24                 |
| Grade ≥3 AEs                                  | 14        | 4071             | 3958      | 0                     | 0.84    | 0.98 (0.95, 1.00)                                   | 0.08                 |
| Death                                         | 15        | 4457             | 4345      | 0                     | 1.00    | 1.04 (0.97, 1.12)                                   | 0.25                 |
| Neutropenia (Grade ≥3 AEs)                    | 11        | 3504             | 3491      | 17                    | 0.28    | 0.97 (0.84, 1.12)                                   | 0.66                 |
| Thrombocytopenia (Grade ≥3 AEs)               | 10        | 3125             | 3107      | 0                     | 0.93    | 1.09 (0.86, 1.37)                                   | 0.48                 |
| <b>Immunogenicity outcome</b>                 |           |                  |           |                       |         |                                                     |                      |
| ADA                                           | 13        | 3946             | 2884      | 0                     | 0.63    | 1.04 (0.88, 1.25)                                   | 0.63                 |
| Nab                                           | 5         | 1591             | 1532      | 0                     | 0.82    | 0.78 (0.45, 1.34)                                   | 0.36                 |
| <b>Rituximab biosimilar vs. Rituximab</b>     |           |                  |           |                       |         |                                                     |                      |
| <b>Secondary efficacy endpoints</b>           |           |                  |           |                       |         |                                                     |                      |
| OS (HR)                                       | 1         | 311              | 315       | NA                    | NA      | 0.77 (0.45, 1.33)                                   | 0.34                 |
| PFS (HR)                                      | 3         | 646              | 649       | 42                    | 0.18    | 1.16 (0.87, 1.54)                                   | 0.33                 |
| <b>Safety outcome</b>                         |           |                  |           |                       |         |                                                     |                      |
| SAE                                           | 9         | 1541             | 1549      | 0                     | 0.89    | 1.11 (0.98, 1.27)                                   | 0.11                 |
| Grade ≥3 AEs                                  | 5         | 870              | 878       | 0                     | 0.82    | 1.02 (0.96, 1.08)                                   | 0.61                 |
| Death                                         | 8         | 1471             | 1479      | 0                     | 0.92    | 0.88 (0.64, 1.21)                                   | 0.45                 |
| Neutropenia (Grade ≥3 AEs)                    | 9         | 1260             | 1261      | 0                     | 0.97    | 1.07 (0.88, 1.30)                                   | 0.48                 |
| Thrombocytopenia (Grade ≥3 AEs)               | 3         | 485              | 486       | 47                    | 0.15    | 2.20 (0.48, 10.11)                                  | 0.31                 |
| <b>Immunogenicity outcome</b>                 |           |                  |           |                       |         |                                                     |                      |
| ADA                                           | 5         | 996              | 1005      | 0                     | 0.58    | 1.06 (0.77, 1.46)                                   | 0.72                 |
| Nab                                           | 1         | 157              | 158       | NA                    | NA      | 4.71 (0.21, 105.24)                                 | 0.33                 |
| <b>Trastuzumab biosimilar vs. Trastuzumab</b> |           |                  |           |                       |         |                                                     |                      |
| <b>Secondary efficacy endpoints</b>           |           |                  |           |                       |         |                                                     |                      |
| OS (HR)                                       | 3         | 926              | 930       | 4                     | 0.35    | 0.84 (0.65, 1.07)                                   | 0.15                 |
| PFS (HR)                                      | 3         | 926              | 930       | 0                     | 0.64    | 0.89 (0.76, 1.04)                                   | 0.15                 |
| <b>Safety outcome</b>                         |           |                  |           |                       |         |                                                     |                      |
| SAE                                           | 6         | 1789             | 1792      | 54                    | 0.05    | 0.94 (0.73, 1.21)                                   | 0.63                 |
| Grade ≥3 AEs                                  | 5         | 1562             | 1570      | 0                     | 0.64    | 0.99 (0.94, 1.05)                                   | 0.84                 |
| Death                                         | 6         | 1729             | 1729      | 25                    | 0.24    | 0.79 (0.54, 1.16)                                   | 0.23                 |
| Neutropenia (Grade ≥3 AEs)                    | 6         | 1789             | 1792      | 0                     | 0.89    | 0.96 (0.74, 1.23)                                   | 0.74                 |
| Thrombocytopenia (Grade ≥3 AEs)               | 3         | 1039             | 1043      | 0                     | 0.84    | 1.95 (0.34, 11.20)                                  | 0.46                 |
| <b>Immunogenicity outcome</b>                 |           |                  |           |                       |         |                                                     |                      |
| ADA                                           | 5         | 1626             | 1625      | 0                     | 0.77    | 1.12 (0.58, 2.14)                                   | 0.74                 |
| Nab                                           | 2         | 439              | 435       | 0                     | 0.80    | 0.82 (0.25, 2.66)                                   | 0.74                 |

<sup>a</sup>P value indicates a comparison between different subgroups.

Abbreviations: NA, not available; ORR, objective response rate; PFS, progression-free survival; HR, hazard ratio; OS, overall survival; SAE, serious adverse event; ADA, anti-drug antibody; Nab, neutralizing antibody; CI, confidence interval.

**eTable 13. Pooled analysis of efficacy, safety, and immunogenicity of cancer biosimilars derived from cohort studies.**

| Outcome and cancer subgroup                   | cohort studies, No. | Sample size, No. |           | Test of heterogeneity |         | Results of meta-analysis, effect estimates (95% CI) | P value <sup>a</sup> |
|-----------------------------------------------|---------------------|------------------|-----------|-----------------------|---------|-----------------------------------------------------|----------------------|
|                                               |                     | Biosimilar       | Reference | I <sup>2</sup> , %    | P value |                                                     |                      |
| <b>Bevacizumab biosimilar vs. Bevacizumab</b> |                     |                  |           |                       |         |                                                     |                      |
| <b>Efficacy endpoints</b>                     |                     |                  |           |                       |         |                                                     |                      |
| ORR                                           | 1                   | 551              | 395       | NA                    | NA      | 0.93 (0.77, 1.14)                                   | 0.50                 |
| <b>Safety outcome</b>                         |                     |                  |           |                       |         |                                                     |                      |
| Grade ≥ 3 AEs                                 | 1                   | 551              | 395       | NA                    | NA      | 1.14 (0.88, 1.45)                                   | 0.34                 |
| Neutropenia (Grade ≥ 3 AEs)                   | 1                   | 551              | 395       | NA                    | NA      | 1.14 (0.80, 1.64)                                   | 0.47                 |
| Thrombocytopenia (Grade ≥ 3 AEs)              | 1                   | 551              | 395       | NA                    | NA      | 1.58 (0.55, 4.50)                                   | 0.39                 |
| <b>Rituximab biosimilar vs. Rituximab</b>     |                     |                  |           |                       |         |                                                     |                      |
| <b>Efficacy endpoints</b>                     |                     |                  |           |                       |         |                                                     |                      |
| ORR                                           | 3                   | 179              | 179       | 0                     | 0.25    | 1.00 (0.92, 1.01)                                   | 0.88                 |
| <b>Safety outcome</b>                         |                     |                  |           |                       |         |                                                     |                      |
| Grade ≥ 3 AEs                                 | 2                   | 87               | 119       | 0                     | 0.66    | 0.78 (0.51, 1.18)                                   | 0.23                 |
| Neutropenia (Grade ≥ 3 AEs)                   | 2                   | 87               | 119       | 0                     | 0.98    | 0.90 (0.49, 1.64)                                   | 0.75                 |
| Death                                         | 2                   | 164              | 161       | 0                     | 0.98    | 1.32 (0.43, 4.07)                                   | 0.63                 |
| <b>Trastuzumab biosimilar vs. Trastuzumab</b> |                     |                  |           |                       |         |                                                     |                      |
| <b>Efficacy endpoints</b>                     |                     |                  |           |                       |         |                                                     |                      |
| ORR                                           | 3                   | 229              | 409       | 0                     | 0.72    | 1.00 (0.87, 1.16)                                   | 0.96                 |
| pCR                                           | 5                   | 294              | 298       | 0                     | 0.91    | 1.04 [0.93; 1.17]                                   | 0.50                 |
| <b>Safety outcome</b>                         |                     |                  |           |                       |         |                                                     |                      |
| Grade ≥ 3 AEs                                 | 3                   | 141              | 285       | 41                    | 0.19    | 1.02 (0.81, 1.30)                                   | 0.86                 |
| Neutropenia (Grade ≥ 3 AEs)                   | 1                   | 65               | 40        | NA                    | NA      | 1.86 (0.08, 44.67)                                  | 0.70                 |
| Thrombocytopenia (Grade ≥ 3 AEs)              | 1                   | 65               | 40        | NA                    | NA      | 1.53 (0.31, 7.56)                                   | 0.60                 |

<sup>a</sup>P value indicates a comparison between different subgroups.

Abbreviations: NA, not available; ORR, objective response rate; pCR, pathologic complete response; PFS, progression-free survival; OS, overall survival; SAE, serious adverse event; CI, confidence interval.

**eTable 14. The weighted mean price of rituximab, bevacizumab, trastuzumab, and their biosimilars (per unit) between 2015 and 2022.**

| Year | Bevacizumab (\$/mg) |           |                      | Rituximab (\$/mg) |           |                      | Trastuzumab (\$/mg) |           |                      |
|------|---------------------|-----------|----------------------|-------------------|-----------|----------------------|---------------------|-----------|----------------------|
|      | Biosimilar          | Reference | B/R <sup>a</sup> (%) | Biosimilar        | Reference | B/R <sup>a</sup> (%) | Biosimilar          | Reference | B/R <sup>a</sup> (%) |
| 2022 | 1.63                | 2.21      | 74                   | 1.55              | 2.23      | 69                   | 1.66                | 1.85      | 90                   |
| 2021 | 1.67                | 2.23      | 75                   | 1.59              | 2.35      | 68                   | 1.68                | 1.86      | 90                   |
| 2020 | 1.76                | 2.25      | 78                   | 1.84              | 2.36      | 78                   | 1.69                | 1.87      | 90                   |
| 2019 | 1.79                | 3.03      | 59                   | 2.37              | 2.47      | 96                   | NA                  | 2.59      | NA                   |
| 2018 | NA                  | 3.09      | NA                   | NA                | 3.40      | NA                   | NA                  | 2.64      | NA                   |
| 2017 | NA                  | 5.61      | NA                   | NA                | 4.65      | NA                   | NA                  | 4.39      | NA                   |
| 2016 | NA                  | 8.64      | NA                   | NA                | 5.93      | NA                   | NA                  | 8.42      | NA                   |
| 2015 | NA                  | 8.66      | NA                   | NA                | 6.12      | NA                   | NA                  | 8.22      | NA                   |

Abbreviations: B, biosimilar; R, reference; <sup>a</sup>B/R is defined as the price ratio of the biosimilar to the reference drug; NA, not available.

**eTable 15. Trends in the uptake rate of rituximab, bevacizumab, and trastuzumab biosimilars vs reference drugs after market entry as of December 2022**

| Time frames of market entry                   | Date of market entry | Biosimilar, mg | Reference, mg | Overall <sup>a</sup> , mg | B/O <sup>b</sup> (%) |
|-----------------------------------------------|----------------------|----------------|---------------|---------------------------|----------------------|
| <b>Bevacizumab biosimilar vs. Bevacizumab</b> |                      |                |               |                           |                      |
| M <sub>1-3</sub>                              | 2019 <sub>Q4</sub>   | 7186           | 493757        | 500943                    | 1                    |
| M <sub>4-6</sub>                              | 2020 <sub>Q1</sub>   | 36002          | 384235        | 420237                    | 9                    |
| M <sub>7-9</sub>                              | 2020 <sub>Q2</sub>   | 226007         | 472741        | 698748                    | 32                   |
| M <sub>10-12</sub>                            | 2020 <sub>Q3</sub>   | 377474         | 502235        | 879709                    | 43                   |
| M <sub>13-15</sub>                            | 2020 <sub>Q4</sub>   | 485623         | 409156        | 894779                    | 54                   |
| M <sub>16-18</sub>                            | 2021 <sub>Q1</sub>   | 837009         | 450771        | 1287780                   | 65                   |
| M <sub>19-21</sub>                            | 2021 <sub>Q2</sub>   | 940418         | 383222        | 1323640                   | 71                   |
| M <sub>22-24</sub>                            | 2021 <sub>Q3</sub>   | 1181508        | 394229        | 1575737                   | 75                   |
| M <sub>25-27</sub>                            | 2021 <sub>Q4</sub>   | 1153490        | 351618        | 1505108                   | 77                   |
| M <sub>28-30</sub>                            | 2022 <sub>Q1</sub>   | 1185853        | 294534        | 1480387                   | 80                   |
| M <sub>31-33</sub>                            | 2022 <sub>Q2</sub>   | 1376403        | 269110        | 1645513                   | 84                   |
| M <sub>34-36</sub>                            | 2022 <sub>Q3</sub>   | 1575914        | 308869        | 1884783                   | 84                   |
| M <sub>37-39</sub>                            | 2022 <sub>Q4</sub>   | 1279435        | 233691        | 1513126                   | 85                   |
| <b>Rituximab biosimilar vs. Rituximab</b>     |                      |                |               |                           |                      |
| M <sub>1-3</sub>                              | 2019 <sub>Q2</sub>   | 717            | 385942        | 386659                    | 0                    |
| M <sub>4-6</sub>                              | 2019 <sub>Q3</sub>   | 15498          | 373160        | 388658                    | 4                    |
| M <sub>7-9</sub>                              | 2019 <sub>Q4</sub>   | 23788          | 303334        | 327122                    | 7                    |
| M <sub>10-12</sub>                            | 2020 <sub>Q1</sub>   | 43346          | 202112        | 245458                    | 18                   |
| M <sub>13-15</sub>                            | 2020 <sub>Q2</sub>   | 100002         | 276208        | 376210                    | 27                   |
| M <sub>16-18</sub>                            | 2020 <sub>Q3</sub>   | 158286         | 229785        | 388071                    | 41                   |
| M <sub>19-21</sub>                            | 2020 <sub>Q4</sub>   | 176735         | 164032        | 340767                    | 52                   |
| M <sub>22-24</sub>                            | 2021 <sub>Q1</sub>   | 266696         | 230927        | 497623                    | 54                   |
| M <sub>25-27</sub>                            | 2021 <sub>Q2</sub>   | 320382         | 205045        | 525427                    | 61                   |
| M <sub>28-30</sub>                            | 2021 <sub>Q3</sub>   | 410411         | 243848        | 654259                    | 63                   |
| M <sub>31-33</sub>                            | 2021 <sub>Q4</sub>   | 394913         | 188240        | 583153                    | 68                   |
| M <sub>34-36</sub>                            | 2022 <sub>Q1</sub>   | 383601         | 180160        | 563761                    | 68                   |
| M <sub>37-39</sub>                            | 2022 <sub>Q2</sub>   | 434918         | 155895        | 590813                    | 74                   |
| M <sub>40-42</sub>                            | 2022 <sub>Q3</sub>   | 504666         | 157110        | 661776                    | 76                   |
| M <sub>43-45</sub>                            | 2022 <sub>Q4</sub>   | 410409         | 121447        | 531856                    | 77                   |
| <b>Trastuzumab biosimilar vs. Trastuzumab</b> |                      |                |               |                           |                      |
| M <sub>1-3</sub>                              | 2020 <sub>Q3</sub>   | 935            | 200390        | 201325                    | 0                    |
| M <sub>4-6</sub>                              | 2020 <sub>Q4</sub>   | 18379          | 197674        | 216053                    | 9                    |
| M <sub>7-9</sub>                              | 2021 <sub>Q1</sub>   | 83070          | 254566        | 337636                    | 25                   |
| M <sub>10-12</sub>                            | 2021 <sub>Q2</sub>   | 120180         | 263731        | 383911                    | 31                   |

|                    |                    |        |        |        |    |
|--------------------|--------------------|--------|--------|--------|----|
| M <sub>13-15</sub> | 2021 <sub>Q3</sub> | 176843 | 256501 | 433344 | 41 |
| M <sub>16-18</sub> | 2021 <sub>Q4</sub> | 196913 | 248212 | 445125 | 44 |
| M <sub>19-21</sub> | 2022 <sub>Q1</sub> | 215587 | 226398 | 441985 | 49 |
| M <sub>22-24</sub> | 2022 <sub>Q2</sub> | 248326 | 224295 | 472621 | 53 |
| M <sub>25-27</sub> | 2022 <sub>Q3</sub> | 303579 | 220637 | 524216 | 58 |
| M <sub>28-30</sub> | 2022 <sub>Q4</sub> | 279375 | 202689 | 482064 | 58 |

M<sub>n</sub>, Month from launch; Q, Quarter; B, biosimilar; O, <sup>a</sup>overall, overall is defined as the sum of sales volume of biosimilars and reference drugs quarterly; <sup>b</sup>B/O is defined as the ratio of sales volume of biosimilars to overall quarterly.

**eTable 16. Uptake rates of cancer biosimilars vs reference drugs in the first year, second year, and latest time on the market**

| <b>Biosimilars</b> | <b>First year after launching</b> | <b>Second year after launching</b> | <b>Latest year (2022)</b> |
|--------------------|-----------------------------------|------------------------------------|---------------------------|
| Bevacizumab        | 26%                               | 68%                                | 83%                       |
| Rituximab          | 6%                                | 44%                                | 74%                       |
| Trastuzumab        | 20%                               | 47%                                | 54%                       |

The annual uptake rate for biosimilars is calculated by dividing the one-year sales of biosimilars by the one-year sales of their reference drugs.

**eTable 17. Reimbursable cancer indications for the biosimilars and reference drugs of bevacizumab, rituximab, and trastuzumab in the National Reimbursement Drug List in China (As of July 1, 2023).**

| Originator  | Reimbursable indications                                                                                                                                                                                                                                                  |
|-------------|---------------------------------------------------------------------------------------------------------------------------------------------------------------------------------------------------------------------------------------------------------------------------|
| Bevacizumab | 1. Metastatic colorectal cancer<br>2. Advanced, metastatic, or recurrent non-small non-squamous cell lung cancer<br>3. Recurrent Glioblastoma<br>4. Hepatocellular carcinoma<br>5. Epithelial ovarian, fallopian tube, or primary peritoneal cancer<br>6. Cervical cancer |
| Rituximab   | 1. Non-Hodgkin' s lymphoma<br>2. Chronic lymphocytic leukemia                                                                                                                                                                                                             |
| Trastuzumab | 1. HER2-overexpressing metastatic breast cancer (MBC);<br>2. HER2-overexpressing early breast cancer (Adjuvant and neoadjuvant therapy, paid for no more than 12 months) <sup>a</sup> ;<br>3. HER2-overexpressing metastatic gastric cancer <sup>b</sup> .                |

<sup>a</sup>HER2-overexpressing early breast cancer indication is included in NRDL, but only paid for no more than 12 months;

<sup>b</sup>Trastuzumab is approved for HER2-overexpressing metastatic gastric or gastroesophageal junction enocarcinoma, but reimbursement only paid for HER2-overexpressing metastatic gastric cancer.



**eTable 18. Comparison the approved indications of cancer biosimilars vs reference drugs by the NMPA, FDA, EMA, and PMDA (As of July 2023).**

| Number                                         | NMPA                                                                                                                                                                                                                                                                                                            | FDA                                                                                                                                                                                                                                                                                                                                                                                                                             | EMA                                                                                                                                                                                                                                                                                                                                                                                                               | PMDA                                                                                                                                                                                                                                                                                                                                                                                                               |
|------------------------------------------------|-----------------------------------------------------------------------------------------------------------------------------------------------------------------------------------------------------------------------------------------------------------------------------------------------------------------|---------------------------------------------------------------------------------------------------------------------------------------------------------------------------------------------------------------------------------------------------------------------------------------------------------------------------------------------------------------------------------------------------------------------------------|-------------------------------------------------------------------------------------------------------------------------------------------------------------------------------------------------------------------------------------------------------------------------------------------------------------------------------------------------------------------------------------------------------------------|--------------------------------------------------------------------------------------------------------------------------------------------------------------------------------------------------------------------------------------------------------------------------------------------------------------------------------------------------------------------------------------------------------------------|
| <b>Bevacizumab and Bevacizumab biosimilars</b> |                                                                                                                                                                                                                                                                                                                 |                                                                                                                                                                                                                                                                                                                                                                                                                                 |                                                                                                                                                                                                                                                                                                                                                                                                                   |                                                                                                                                                                                                                                                                                                                                                                                                                    |
| Reference drug                                 | <b>Avastin (Roche)</b><br>1. Metastatic colorectal cancer<br>2. Advanced, metastatic, or recurrent non-small non-squamous cell lung cancer<br>3. Recurrent Glioblastoma<br>4. Hepatocellular carcinoma (HCC)<br>5. Epithelial ovarian, fallopian tube, or primary peritoneal cancer<br>6. Cervical cancer       | <b>Avastin (Roche)</b><br>1. Metastatic colorectal cancer<br>2. Unresectable, locally advanced, recurrent or metastatic non-squamous non-small cell lung cancer<br>3. Recurrent glioblastoma<br>4. Hepatocellular carcinoma (HCC)<br>5. Epithelial ovarian, fallopian tube, or primary peritoneal cancer<br>6. Persistent, recurrent, or metastatic cervical cancer<br>7. Metastatic renal cell carcinoma                       | <b>Avastin (Roche)</b><br>1. Metastatic carcinoma of the colon or rectum<br>2. Unresectable advanced, metastatic or recurrent nono-squamous non-small cell lung cancer<br>3. Epithelial ovarian, fallopian tube, or primary peritoneal cancer<br>4. Persistent, recurrent, or metastatic carcinoma of the cervix<br>5. Advanced and/or metastatic renal cell cancer<br>6. Metastatic breast cancer                | <b>Avastin (Roche)</b><br>1. Unresectable advanced or recurrent colorectal cancer<br>2. Unresectable advanced or recurrent non-small cell lung cancer<br>3. Malignant Glioblastoma<br>4. Unresectable hepatocellular carcinoma (HCC)<br>5. Ovarian cancer<br>6. Advanced or recurrent cervical cancer<br>7. Inoperable or recurrent breast cancer                                                                  |
| 1                                              | <b>Hanbeitai (Henlius) [HLX04]</b><br>1. Metastatic colorectal cancer<br>2. Advanced, metastatic, or recurrent non-small non-squamous cell lung cancer<br>3. Recurrent Glioblastoma<br>4. Hepatocellular carcinoma<br>5. Epithelial ovarian, fallopian tube, or primary peritoneal cancer<br>6. Cervical cancer | <b>Zirabev (Pfizer) [PF-06439535]</b><br>1. Metastatic colorectal cancer<br>2. Unresectable, locally advanced, recurrent or metastatic non-squamous non-small cell lung cancer<br>3. Recurrent glioblastoma<br>4. <b>Hepatocellular carcinoma (HCC)</b><br>5. Epithelial ovarian, fallopian tube, or primary peritoneal cancer<br>6. Persistent, recurrent, or metastatic cervical cancer<br>7. Metastatic renal cell carcinoma | <b>Zirabev (Pfizer) [PF-06439535]</b><br>1. Metastatic carcinoma of the colon or rectum<br>2. Unresectable advanced, metastatic or recurrent nono-squamous non-small cell lung cancer<br>3. Epithelial ovarian, fallopian tube, or primary peritoneal cancer<br>4. Persistent, recurrent, or metastatic carcinoma of the cervix<br>5. Advanced and/or metastatic renal cell cancer<br>6. Metastatic breast cancer | <b>Bevacizumab biosimilar (Pfizer) [PF-06439535]</b><br>1. Unresectable advanced or recurrent colorectal cancer<br>2. Unresectable advanced or recurrent non-small cell lung cancer<br>3. <b>Malignant Glioblastoma</b><br>4. <b>Unresectable hepatocellular carcinoma (HCC)</b><br>5. <b>Ovarian cancer</b><br>6. <b>Advanced or recurrent cervical cancer</b><br>7. <b>Inoperable or recurrent breast cancer</b> |
| 2                                              | <b>Puxinting (TOT Biopharm) [TAB 008]</b><br>1. Metastatic colorectal cancer<br>2. Advanced, metastatic, or recurrent non-small                                                                                                                                                                                 | <b>Alymsys (Amneal) [MB02]</b><br>1. Metastatic colorectal cancer<br>2. Unresectable, locally advanced, recurrent or metastatic non-squamous non-small cell lung cancer                                                                                                                                                                                                                                                         | <b>Alymsys (Mabxience) [MB02]</b><br>1. Metastatic carcinoma of the colon or rectum<br>2. Unresectable advanced, metastatic or recurrent nono-squamous non-small cell lung cancer                                                                                                                                                                                                                                 | <b>Bevacizumab biosimilar (Amgen/Daiichi-Sankyo) [ABP215]</b><br>1. Unresectable advanced or recurrent colorectal cancer<br>2. Unresectable advanced or recurrent non-small cell lung cancer                                                                                                                                                                                                                       |

| Number | NMPA                                                                                                                                                                                                                                                                                                                                                 | FDA                                                                                                                                                                                                                                                                                                                                                                                                                                                        | EMA                                                                                                                                                                                                                                                                                                                                                                                                                                             | PMDA                                                                                                                                                                                                                                                                                                                                                                                                                           |
|--------|------------------------------------------------------------------------------------------------------------------------------------------------------------------------------------------------------------------------------------------------------------------------------------------------------------------------------------------------------|------------------------------------------------------------------------------------------------------------------------------------------------------------------------------------------------------------------------------------------------------------------------------------------------------------------------------------------------------------------------------------------------------------------------------------------------------------|-------------------------------------------------------------------------------------------------------------------------------------------------------------------------------------------------------------------------------------------------------------------------------------------------------------------------------------------------------------------------------------------------------------------------------------------------|--------------------------------------------------------------------------------------------------------------------------------------------------------------------------------------------------------------------------------------------------------------------------------------------------------------------------------------------------------------------------------------------------------------------------------|
|        | <p>non-squamous cell lung cancer</p> <p>3. Recurrent Glioblastoma</p> <p>4. Hepatocellular carcinoma</p> <p>5. Epithelial ovarian, fallopian tube, or primary peritoneal cancer</p> <p>6. Cervical cancer</p>                                                                                                                                        | <p>3. Recurrent glioblastoma</p> <p>4. Hepatocellular carcinoma (HCC)</p> <p>5. Epithelial ovarian, fallopian tube, or primary peritoneal cancer</p> <p>6. Persistent, recurrent, or metastatic cervical cancer</p> <p>7. Metastatic renal cell carcinoma</p>                                                                                                                                                                                              | <p>3. Epithelial ovarian, fallopian tube, or primary peritoneal cancer.</p> <p>4. Persistent, recurrent, or metastatic carcinoma of the cervix</p> <p>5. Advanced and/or metastatic renal cell cancer</p> <p>6. Metastatic breast cancer</p>                                                                                                                                                                                                    | <p>3. Malignant Glioblastoma</p> <p>4. Unresectable hepatocellular carcinoma (HCC)</p> <p>5. Ovarian cancer</p> <p>6. Advanced or recurrent cervical cancer</p> <p>7. Inoperable or recurrent breast cancer</p>                                                                                                                                                                                                                |
| 3      | <p><b>Beianging (Beta/ Mabwork) [MIL60]</b></p> <p>1. Metastatic colorectal cancer</p> <p>2. Advanced, metastatic, or recurrent non-small non-squamous cell lung cancer</p> <p>3. Recurrent Glioblastoma</p> <p>4. Hepatocellular carcinoma</p> <p>5. Epithelial ovarian, fallopian tube, or primary peritoneal cancer</p> <p>6. Cervical cancer</p> | <p><b>Vegzelma (Celltrion) [CT-P16]</b></p> <p>1. Metastatic colorectal cancer</p> <p>2. Unresectable, locally advanced, recurrent or metastatic non-squamous non-small cell lung cancer</p> <p>3. Recurrent glioblastoma</p> <p>4. Hepatocellular carcinoma (HCC)</p> <p>5. Epithelial ovarian, fallopian tube, or primary peritoneal cancer</p> <p>6. Persistent, recurrent, or metastatic cervical cancer</p> <p>7. Metastatic renal cell carcinoma</p> | <p><b>Vegzelma (Celltrion) [CT-P16]</b></p> <p>1. Metastatic carcinoma of the colon or rectum</p> <p>2. Unresectable advanced, metastatic or recurrent nono-squamous non-small cell lung cancer</p> <p>3. Epithelial ovarian, fallopian tube, or primary peritoneal cancer</p> <p>4. Persistent, recurrent, or metastatic carcinoma of the cervix</p> <p>5. Advanced and/or metastatic renal cell cancer</p> <p>6. Metastatic breast cancer</p> | <p><b>Bevacizumab biosimilar (Nipponkayaku/ Celltrion) [CT-P16]</b></p> <p>1. Unresectable advanced or recurrent colorectal cancer</p> <p>2. Unresectable advanced or recurrent non-small cell lung cancer</p> <p>3. Malignant Glioblastoma</p> <p>4. Unresectable hepatocellular carcinoma (HCC)</p> <p>5. Ovarian cancer</p> <p>6. Advanced or recurrent cervical cancer</p> <p>7. Inoperable or recurrent breast cancer</p> |
| 4      | <p><b>Pubeixi (Bio-Thera) [BAT1706]</b></p> <p>1. Metastatic colorectal cancer</p> <p>2. Advanced, metastatic, or recurrent non-small non-squamous cell lung cancer</p> <p>3. Recurrent Glioblastoma</p> <p>4. Hepatocellular carcinoma</p> <p>5. Epithelial ovarian, fallopian tube, or primary peritoneal cancer</p> <p>6. Cervical cancer</p>     | <p><b>Mvasi (Amgen) [ABP215]</b></p> <p>1. Metastatic colorectal cancer</p> <p>2. Unresectable, locally advanced, recurrent or metastatic non-squamous non-small cell lung cancer</p> <p>3. Recurrent glioblastoma</p> <p>4. Hepatocellular carcinoma (HCC)</p> <p>5. Epithelial ovarian, fallopian tube, or primary peritoneal cancer</p> <p>6. Persistent, recurrent, or metastatic cervical cancer</p> <p>7. Metastatic renal cell carcinoma</p>        | <p><b>Mvasi (Amgen) [ABP215]</b></p> <p>1. Metastatic carcinoma of the colon or rectum</p> <p>2. Unresectable advanced, metastatic or recurrent nono-squamous non-small cell lung cancer</p> <p>3. Epithelial ovarian, fallopian tube, or primary peritoneal cancer</p> <p>4. Persistent, recurrent, or metastatic carcinoma of the cervix</p> <p>5. Advanced and/or metastatic renal cell cancer</p> <p>6. Metastatic breast cancer</p>        | <p><b>Bevacizumab biosimilar (Nichiiiko) [MB02]</b></p> <p>1. Unresectable advanced or recurrent colorectal cancer</p> <p>2. Unresectable advanced or recurrent non-small cell lung cancer</p> <p>3. Malignant Glioblastoma</p> <p>4. Unresectable hepatocellular carcinoma (HCC)</p> <p>5. Ovarian cancer</p> <p>6. Advanced or recurrent cervical cancer</p> <p>7. Inoperable or recurrent breast cancer</p>                 |

| Number | NMPA                                                                                                                                                                                                                                                                                                           | FDA | EMA                                                                                                                                                                                                                                                                                                                                                                                                           | PMDA |
|--------|----------------------------------------------------------------------------------------------------------------------------------------------------------------------------------------------------------------------------------------------------------------------------------------------------------------|-----|---------------------------------------------------------------------------------------------------------------------------------------------------------------------------------------------------------------------------------------------------------------------------------------------------------------------------------------------------------------------------------------------------------------|------|
| 5      | <b>Airuituo (Hengrui) [BP102]</b><br>1. Metastatic colorectal cancer<br>2. Advanced, metastatic, or recurrent non-small non-squamous cell lung cancer<br>3. Recurrent Glioblastoma<br>4. Hepatocellular carcinoma<br>5. Epithelial ovarian, fallopian tube, or primary peritoneal cancer<br>6. Cervical cancer |     | <b>Abevmy (Mylan) [MYL-1402O]</b><br>1. Metastatic carcinoma of the colon or rectum<br>2. Unresectable advanced, metastatic or recurrent nono-squamous non-small cell lung cancer<br>3. Epithelial ovarian, fallopian tube, or primary peritoneal cancer<br>4. Persistent, recurrent, or metastatic carcinoma of the cervix<br>5. Advanced and/or metastatic renal cell cancer<br>6. Metastatic breast cancer |      |
| 6      | <b>Boyounuo (Luye) [LY01008]</b><br>1. Metastatic colorectal cancer<br>2. Advanced, metastatic, or recurrent non-small non-squamous cell lung cancer<br>3. Recurrent Glioblastoma<br>4. Hepatocellular carcinoma<br>5. Epithelial ovarian, fallopian tube, or primary peritoneal cancer<br>6. Cervical cancer  |     | <b>Aybintio (Samsung) [SB8]</b><br>1. Metastatic carcinoma of the colon or rectum<br>2. Unresectable advanced, metastatic or recurrent nono-squamous non-small cell lung cancer<br>3. Epithelial ovarian, fallopian tube, or primary peritoneal cancer<br>4. Persistent, recurrent, or metastatic carcinoma of the cervix<br>5. Advanced and/or metastatic renal cell cancer<br>6. Metastatic breast cancer   |      |

| Number                                       | NMPA                                                                                                                                                                                                                                                                                                                            | FDA | EMA                                                                                                                                                                                                                                                                                                                                                                                                                                 | PMDA |
|----------------------------------------------|---------------------------------------------------------------------------------------------------------------------------------------------------------------------------------------------------------------------------------------------------------------------------------------------------------------------------------|-----|-------------------------------------------------------------------------------------------------------------------------------------------------------------------------------------------------------------------------------------------------------------------------------------------------------------------------------------------------------------------------------------------------------------------------------------|------|
| 7                                            | <b>Dayoutong (Innovent) [IBI305]</b><br>1. Metastatic colorectal cancer<br>2. Advanced, metastatic, or recurrent non-small non-squamous cell lung cancer<br>3. Recurrent Glioblastoma<br>4. Hepatocellular carcinoma<br>5. Epithelial ovarian, fallopian tube, or primary peritoneal cancer<br>6. Cervical cancer               |     | <b>WITHDRAWAL</b><br><b>Equidacent (Centus) [FKB-238]</b><br>1. Metastatic carcinoma of the colon or rectum<br>2. Unresectable advanced, metastatic or recurrent no-squamous non-small cell lung cancer<br>3. Epithelial ovarian, fallopian tube, or primary peritoneal cancer<br>4. Persistent, recurrent, or metastatic carcinoma of the cervix<br>5. Advanced and/or metastatic renal cell cancer<br>6. Metastatic breast cancer |      |
| 8                                            | <b>Ankeda (Qilu) [QL1101]</b><br>1. Metastatic colorectal cancer<br>2. Advanced, metastatic, or recurrent non-small non-squamous cell lung cancer<br>3. Recurrent Glioblastoma<br>4. <b>Hepatocellular carcinoma</b><br>5. <b>Epithelial ovarian, fallopian tube, or primary peritoneal cancer</b><br>6. <b>Cervical cancer</b> |     |                                                                                                                                                                                                                                                                                                                                                                                                                                     |      |
| <b>Rituximab versus rituximab biosimilar</b> |                                                                                                                                                                                                                                                                                                                                 |     |                                                                                                                                                                                                                                                                                                                                                                                                                                     |      |

| Number         | NMPA                                                                                                           | FDA                                                                                                                                                                                                                                                                                    | EMA                                                                                                                                                                                                                                                                                                                  | PMDA                                                                                                                                                                                                             |
|----------------|----------------------------------------------------------------------------------------------------------------|----------------------------------------------------------------------------------------------------------------------------------------------------------------------------------------------------------------------------------------------------------------------------------------|----------------------------------------------------------------------------------------------------------------------------------------------------------------------------------------------------------------------------------------------------------------------------------------------------------------------|------------------------------------------------------------------------------------------------------------------------------------------------------------------------------------------------------------------|
| reference drug | <b>MabThera (Roche)</b><br>1. Non-Hodgkin's lymphoma (NHL)<br>2. Chronic lymphocytic leukemia (CLL)            | <b>Rituxan (Roche)</b><br>1. Non-Hodgkin's lymphoma (NHL)<br>2. Chronic lymphocytic leukemia (CLL)<br>3. Pediatric mature B-cell NHL, diffuse large B-cell lymphoma (DLBCL), Burkitt lymphoma (BL), Burkitt-like lymphoma (BLL) or mature B-cell acute leukemia (B-AL)                 | <b>MabThera (Roche)</b><br>1. Non-Hodgkin's lymphoma (NHL)<br>2. Chronic lymphocytic leukaemia (CLL)<br>3. Pediatric advanced stage CD20 positive diffuse large B-cell lymphoma (DLBCL), Burkitt lymphoma (BL)/Burkitt leukaemia (mature B-cell acute leukaemia) (BAL) or Burkitt-like lymphoma (BLL)                | <b>Rituxan (Zenyaku)</b><br>1. Non-Hodgkin's lymphoma (NHL)<br>2. Chronic lymphocytic leukaemia (CLL)<br>3. B-cell lymphoproliferative disease under immunosuppressive conditions                                |
| 1              | <b>Dabohua (Innovent) [IBI301]</b><br>1. Non-Hodgkin's lymphoma (NHL)<br>2. Chronic lymphocytic leukemia (CLL) | <b>Riabni (Amgen) [ABP 798]</b><br>1. Non-Hodgkin's lymphoma (NHL)<br>2. Chronic lymphocytic leukemia (CLL)<br>3. Pediatric mature B-cell NHL, diffuse large B-cell lymphoma (DLBCL), Burkitt lymphoma (BL), Burkitt-like lymphoma (BLL) or mature B-cell acute leukemia (B-AL)        | <b>Rixathon (Sandoz) [GP2013]</b><br>1. Non-Hodgkin's lymphoma (NHL)<br>2. Chronic lymphocytic leukaemia (CLL)<br>3. Pediatric advanced stage CD20 positive diffuse large B-cell lymphoma (DLBCL), Burkitt lymphoma (BL)/Burkitt leukaemia (mature B-cell acute leukaemia) (BAL) or Burkitt-like lymphoma (BLL)      | <b>Rituximab biosimilar-1 (Sandoz/Kyowa) [GP13-301]</b><br>1. Non-Hodgkin's lymphoma (NHL)<br>2. Chronic lymphocytic leukaemia (CLL)<br>3. B-cell lymphoproliferative disease under immunosuppressive conditions |
| 2              | <b>Hanlikang (Henlius) [HLX01]</b><br>1. Non-Hodgkin's lymphoma (NHL)<br>2. Chronic lymphocytic leukemia (CLL) | <b>Ruxience (Pfizer) [PF-05280586]</b><br>1. Non-Hodgkin's lymphoma (NHL)<br>2. Chronic lymphocytic leukemia (CLL)<br>3. Pediatric mature B-cell NHL, diffuse large B-cell lymphoma (DLBCL), Burkitt lymphoma (BL), Burkitt-like lymphoma (BLL) or mature B-cell acute leukemia (B-AL) | <b>Ruxience (Pfizer) [PF-05280586]</b><br>1. Non-Hodgkin's lymphoma (NHL)<br>2. Chronic lymphocytic leukaemia (CLL)<br>3. Pediatric advanced stage CD20 positive diffuse large B-cell lymphoma (DLBCL), Burkitt lymphoma (BL)/Burkitt leukaemia (mature B-cell acute leukaemia) (BAL) or Burkitt-like lymphoma (BLL) | <b>Rituximab biosimilar-2 (Pfizer) [PF-05280586]</b><br>1. Non-Hodgkin's lymphoma (NHL)<br>2. Chronic lymphocytic leukaemia (CLL)<br>3. B-cell lymphoproliferative disease under immunosuppressive conditions    |
| 3              |                                                                                                                | <b>Truxima (Celltrion) [CT-P10]</b><br>1. Non-Hodgkin's lymphoma (NHL)<br>2. Chronic lymphocytic leukemia (CLL)<br>3. Pediatric mature B-cell NHL, diffuse large B-cell lymphoma (DLBCL), Burkitt lymphoma (BL), Burkitt-like lymphoma (BLL) or mature B-cell acute leukemia (B-AL)    | <b>Truxima (Celltrion) [CT-P10]</b><br>1. Non-Hodgkin's lymphoma (NHL)<br>2. Chronic lymphocytic leukaemia (CLL)<br>3. Pediatric advanced stage CD20 positive diffuse large B-cell lymphoma (DLBCL), Burkitt lymphoma (BL)/Burkitt leukaemia (mature B-cell acute leukaemia) (BAL) or Burkitt-like lymphoma (BLL)    |                                                                                                                                                                                                                  |

| Number                                           | NMPA                                                                                                                                                                                                                                  | FDA                                                                                                                                                                                                                                                | EMA                                                                                                                                                                                                                                | PMDA                                                                                                                                                                                                                                                                                                                             |
|--------------------------------------------------|---------------------------------------------------------------------------------------------------------------------------------------------------------------------------------------------------------------------------------------|----------------------------------------------------------------------------------------------------------------------------------------------------------------------------------------------------------------------------------------------------|------------------------------------------------------------------------------------------------------------------------------------------------------------------------------------------------------------------------------------|----------------------------------------------------------------------------------------------------------------------------------------------------------------------------------------------------------------------------------------------------------------------------------------------------------------------------------|
| <b>Trastuzumab versus trastuzumab biosimilar</b> |                                                                                                                                                                                                                                       |                                                                                                                                                                                                                                                    |                                                                                                                                                                                                                                    |                                                                                                                                                                                                                                                                                                                                  |
| Reference drug                                   | <b>Herceptin (Roche)</b><br>1.HER2-overexpressing metastatic breast cancer (MBC)<br>2.HER2-overexpressing early breast cancer (EBC)<br>3.HER2-overexpressing metastatic gastric or gastroesophageal junction enocarcinoma             | <b>Herceptin (Roche)</b><br>1.HER2-overexpressing metastatic breast cancer (MBC)<br>2.Adjuvant therapy of HER2-overexpressin breast cancer<br>3.HER2-overexpressing metastatic gastric or gastroesophageal junction enocarcinoma                   | <b>Herceptin (Roche)</b><br>1. HER2-positive metastatic breast cancer (MBC)<br>2.HER2-positive early breast cancer (EBC)<br>3.HER2-positive metastatic adenocarcinoma of the stomach or gastroesophageal junction                  | <b>Herceptin (Chugai)</b><br>1. HER2-positive breast cancer<br>2. HER2-positive unresectable advanced or recurrences of gastric cancer<br>3. HER2-positive unresectable advanced recurrent salivary gland cancer<br>4. HER2-positive unresectable advanced and recurred colorectal cancer                                        |
| 1                                                | <b>Hanquyou (Henlius) [HLX02]</b><br>1. HER2-overexpressing metastatic breast cancer (MBC)<br>2. HER2-overexpressing early breast cancer (EBC)<br>3. HER2-overexpressing metastatic gastric or gastroesophageal junction enocarcinoma | <b>Kanjinti (Amgen) [ABP 980]</b><br>1. HER2-overexpressing metastatic breast cancer (MBC)<br>2. Adjuvant therapy of HER2-overexpressin breast cancer<br>3. HER2-overexpressing metastatic gastric or gastroesophageal junction enocarcinoma       | <b>Kanjinti (Amgen) [ABP 980]</b><br>1. HER2-positive metastatic breast cancer (MBC)<br>2. HER2-positive early breast cancer (EBC)<br>3.HER2-positive metastatic adenocarcinoma of the stomach or gastroesophageal junction        | <b>Trastuzumab biosimilar-2 (Daiichi-Sankyo/AMGEN) [ABP 980]</b><br>1. HER2-positive breast cancer<br>2. HER2-positive unresectable advanced or recurrences of gastric cancer<br>3. HER2-positive unresectable advanced recurrent salivary gland cancer<br>4. HER2-positive unresectable advanced and recurred colorectal cancer |
| 2                                                |                                                                                                                                                                                                                                       | <b>Trazimera (Pfizer) [PF-05280014]</b><br>1. HER2-overexpressing metastatic breast cancer (MBC)<br>2. Adjuvant therapy of HER2-overexpressin breast cancer<br>3. HER2-overexpressing metastatic gastric or gastroesophageal junction enocarcinoma | <b>Trazimera (Pfizer) [PF-05280014]</b><br>1. HER2-positive metastatic breast cancer (MBC)<br>2. HER2-positive early breast cancer (EBC)<br>3. HER2-positive metastatic adenocarcinoma of the stomach or gastroesophageal junction | <b>Trastuzumab biosimilar-3 (Pfizer) [PF-05280014]</b><br>1. HER2-positive breast cancer<br>2. HER2-positive unresectable advanced or recurrences of gastric cancer<br>3. HER2-positive unresectable advanced recurrent salivary gland cancer<br>4. HER2-positive unresectable advanced and recurred colorectal cancer           |

| Number | NMPA | FDA                                                                                                                                                                                                                                            | EMA                                                                                                                                                                                                                            | PMDA                                                                                                                                                                                                                                                                                                                |
|--------|------|------------------------------------------------------------------------------------------------------------------------------------------------------------------------------------------------------------------------------------------------|--------------------------------------------------------------------------------------------------------------------------------------------------------------------------------------------------------------------------------|---------------------------------------------------------------------------------------------------------------------------------------------------------------------------------------------------------------------------------------------------------------------------------------------------------------------|
| 3      |      | <b>Ontruzant (Samsung) [SB3]</b><br>1. HER2-overexpressing metastatic breast cancer (MBC)<br>2. Adjuvant therapy of HER2-overexpressin breast cancer<br>3. HER2-overexpressing metastatic gastric or gastroesophageal junction enocarcinoma    | <b>Ontruzant (Samsung) [SB3]</b><br>1. HER2-positive metastatic breast cancer (MBC)<br>2. HER2-positive early breast cancer (EBC)<br>3. HER2-positive metastatic adenocarcinoma of the stomach or gastroesophageal junction    | <b>Trastuzumab biosimilar-1 (Celltrion) [CT-P6]</b><br>1. HER2-positive breast cancer<br>2. HER2-positive unresectable advanced or recurrences of gastric cancer<br>3. HER2-positive unresectable advanced recurrent salivary gland cancer<br>4. HER2-positive unresectable advanced and recurred colorectal cancer |
| 4      |      | <b>Herzuma (Celltrion) [CT-P6]</b><br>1. HER2-overexpressing metastatic breast cancer (MBC)<br>2. Adjuvant therapy of HER2-overexpressin breast cancer<br>3. HER2-overexpressing metastatic gastric or gastroesophageal junction enocarcinoma  | <b>Herzuma (Celltrion) [CT-P6]</b><br>1. HER2-positive metastatic breast cancer (MBC)<br>2. HER2-positive early breast cancer (EBC)<br>3. HER2-positive metastatic adenocarcinoma of the stomach or gastroesophageal junction  |                                                                                                                                                                                                                                                                                                                     |
| 5      |      | <b>Ogivri (Viatris) [MYL-1401O]</b><br>1. HER2-overexpressing metastatic breast cancer (MBC)<br>2. Adjuvant therapy of HER2-overexpressin breast cancer<br>3. HER2-overexpressing metastatic gastric or gastroesophageal junction enocarcinoma | <b>Ogivri (Viatris) [MYL-1401O]</b><br>1. HER2-positive metastatic breast cancer (MBC)<br>2. HER2-positive early breast cancer (EBC)<br>3. HER2-positive metastatic adenocarcinoma of the stomach or gastroesophageal junction |                                                                                                                                                                                                                                                                                                                     |
| 6      |      |                                                                                                                                                                                                                                                | <b>Zercepac (Accord) [HLX02]</b><br>1. HER2-positive metastatic breast cancer (MBC)<br>2. HER2-positive early breast cancer (EBC)<br>3. HER2-positive metastatic adenocarcinoma of the stomach or gastroesophageal junction    |                                                                                                                                                                                                                                                                                                                     |

Red font indicates that the four regulators (NMPA, FDA, EMA and PMDA) have approved the originator's indication, but the biosimilar has not yet been approved for that indication.

Abbreviations: FDA, US Food and Drug Administration; EMA, European Medicines Agency; PMDA, Japanese Pharmaceuticals and Medical Devices Agency; NMPA, National Medical Products Administration.

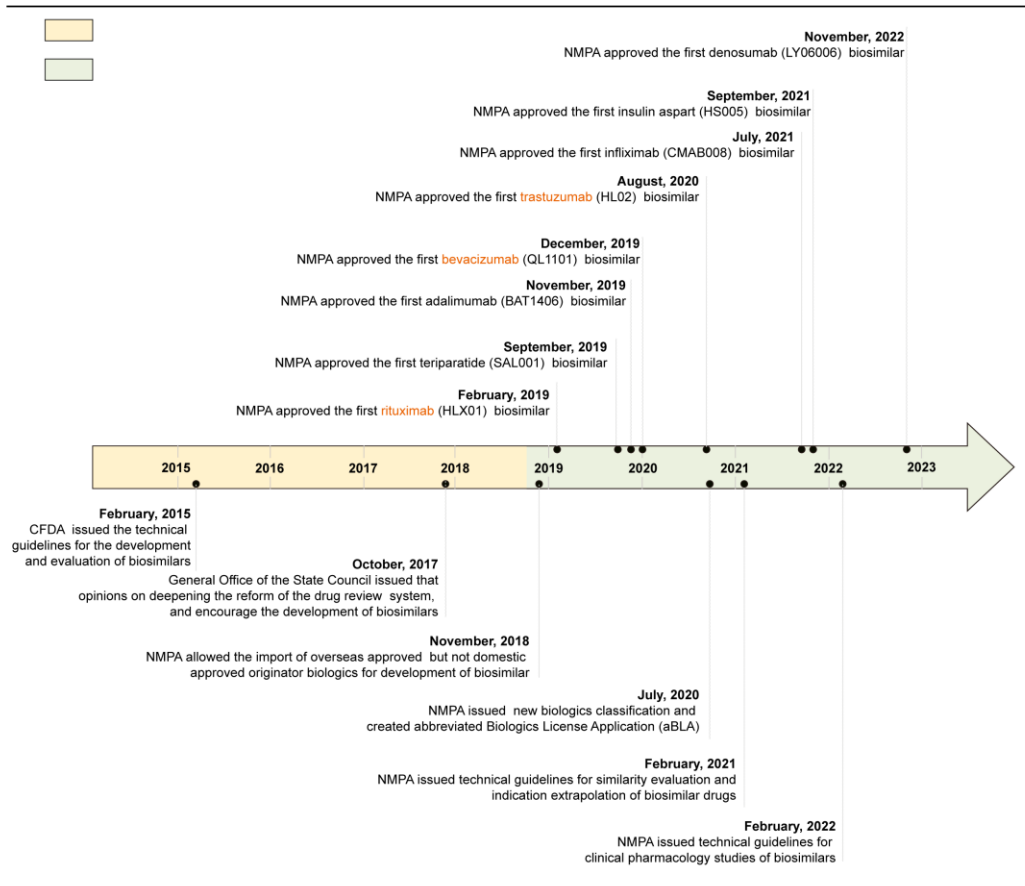

**eFigure 1. The development history of biosimilars in China.**

CFDA: China Food and Drug Administration. NMPA: National Medical Products Administration (Name changed to NMPA in September, 2018).



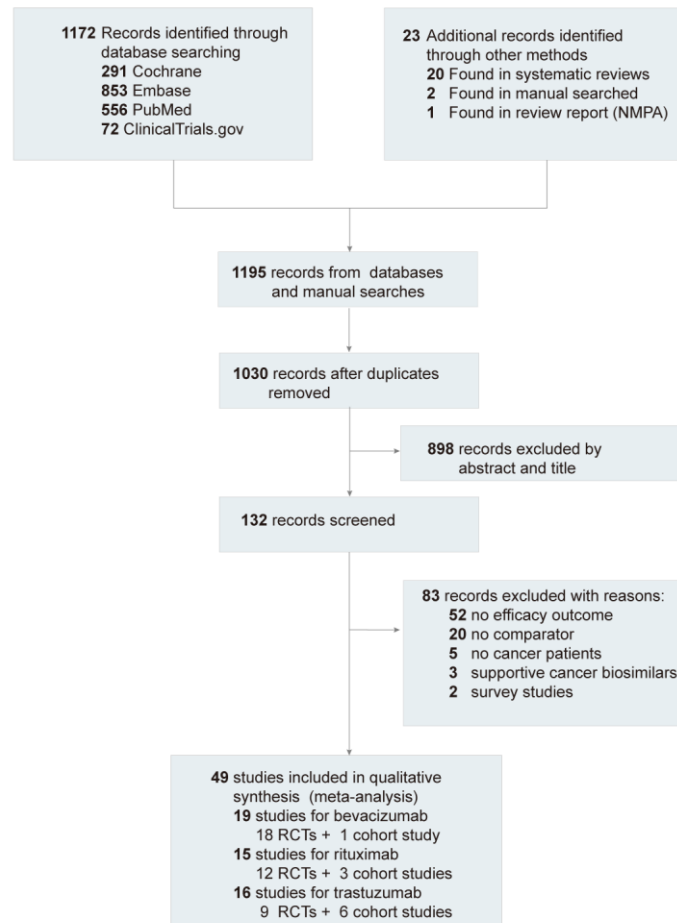

**eFigure 2. Flowchart of included studies for the systematic review and meta-analysis.**

Abbreviations: NMPA, National Medical Products Administration; RCT, randomized clinical trial.

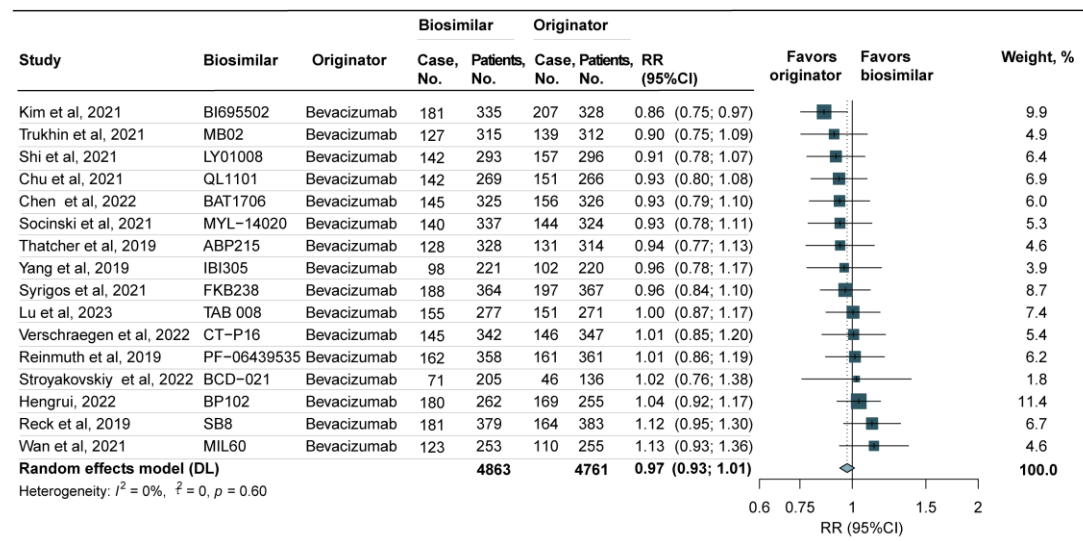

**Figure 3. Meta-analysis of the primary efficacy end points between bevacizumab biosimilars and the originator derived from RCTs.**

Abbreviations: RR, risk ratio. DL, dersimonian and laird method. CI, confidence interval.

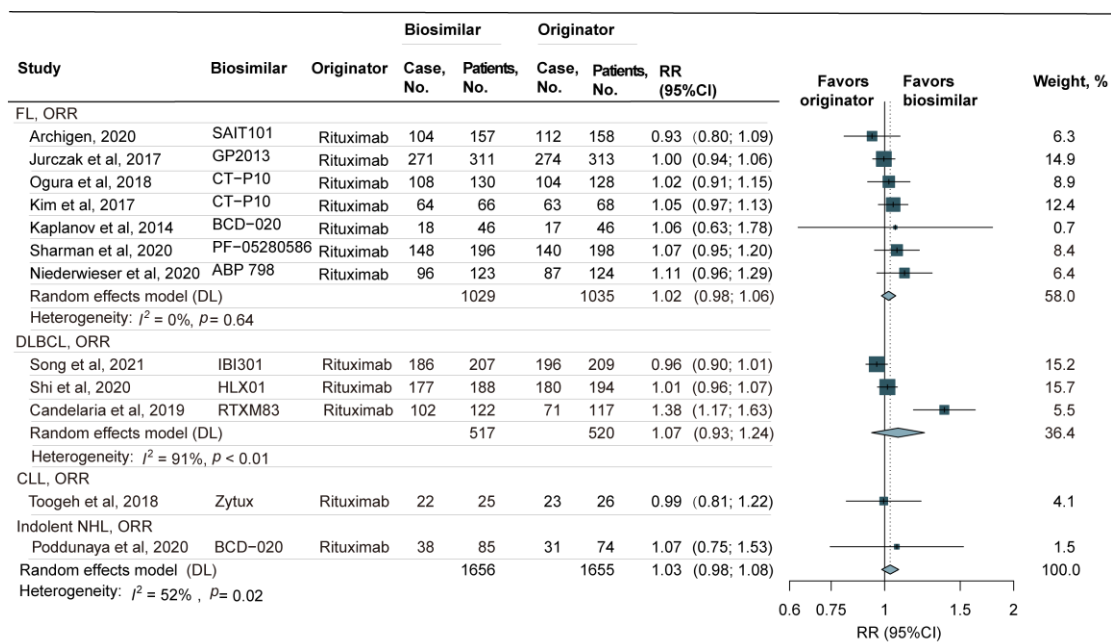

**Figure 4. Meta-analysis of the primary efficacy end points between rituximab biosimilars and the originator stratified by cancer type derived from RCTs.**

Abbreviations: RR, risk ratio. DL, dersimonian and laird method. CI, confidence interval.

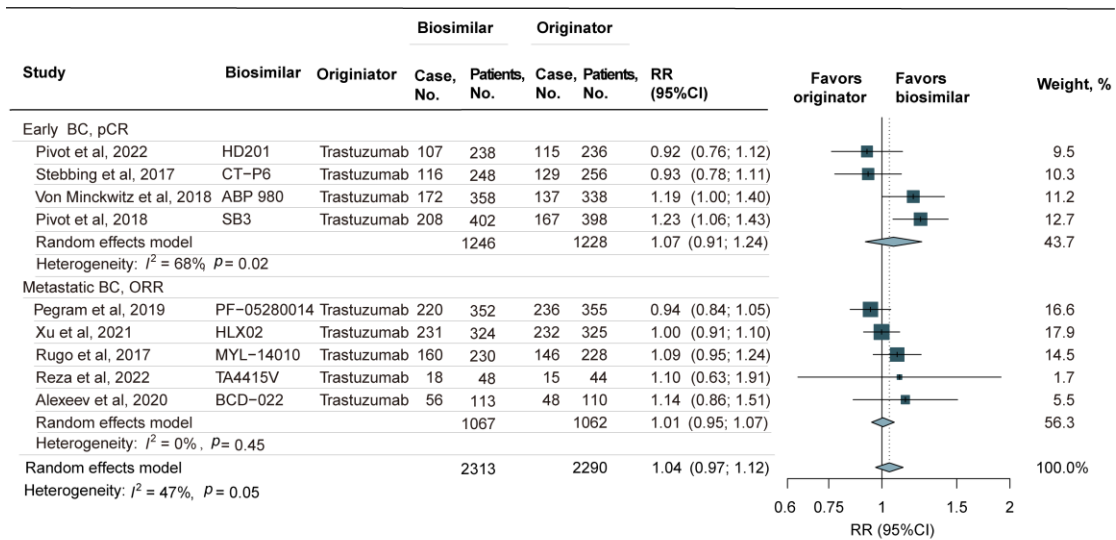

**Figure 5. Meta-analysis of the primary efficacy end points between trastuzumab biosimilars and the originator stratified by cancer type derived from RCTs.**

Abbreviations: RR, risk ratio. DL, dersimonian and laird method. CI, confidence interval.

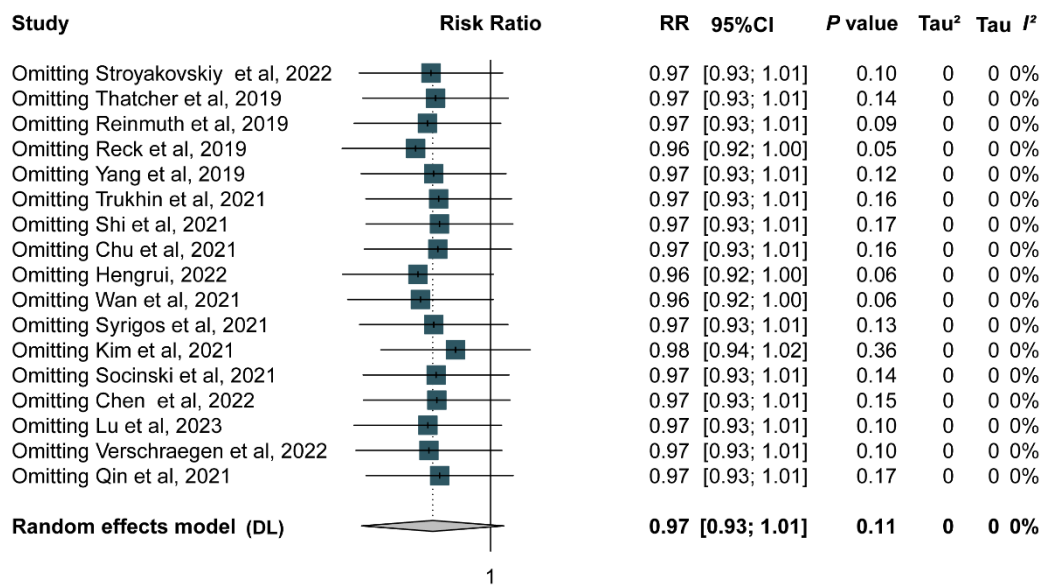

**eFigure 6. Sensitivity analysis of primary efficacy end points for bevacizumab derived from RCTs.**

Abbreviations: DL, dersimonian and laird method. CI, confidence interval.

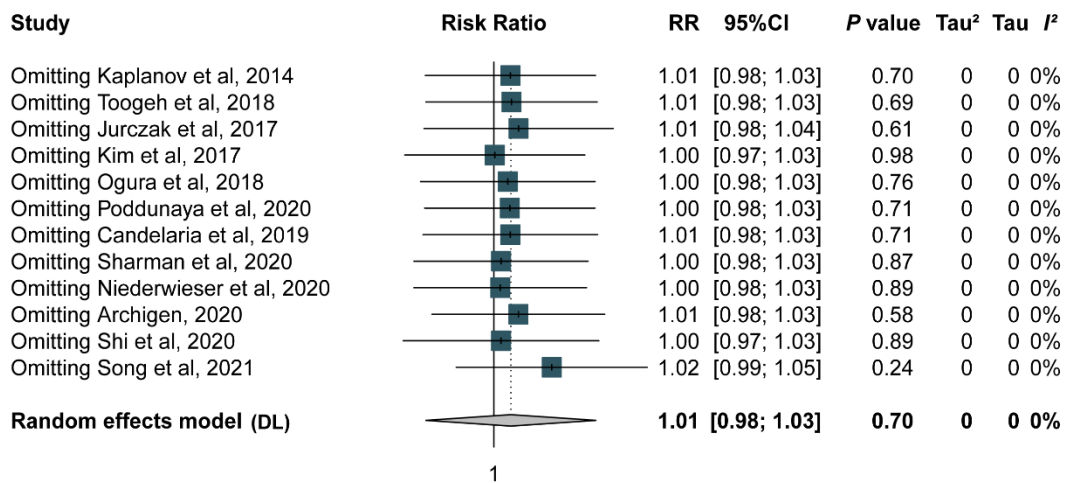

**eFigure 7. Sensitivity analysis of primary efficacy end points for rituximab derived from RCTs.**

Abbreviations: DL, dersimonian and laird method. CI, confidence interval.

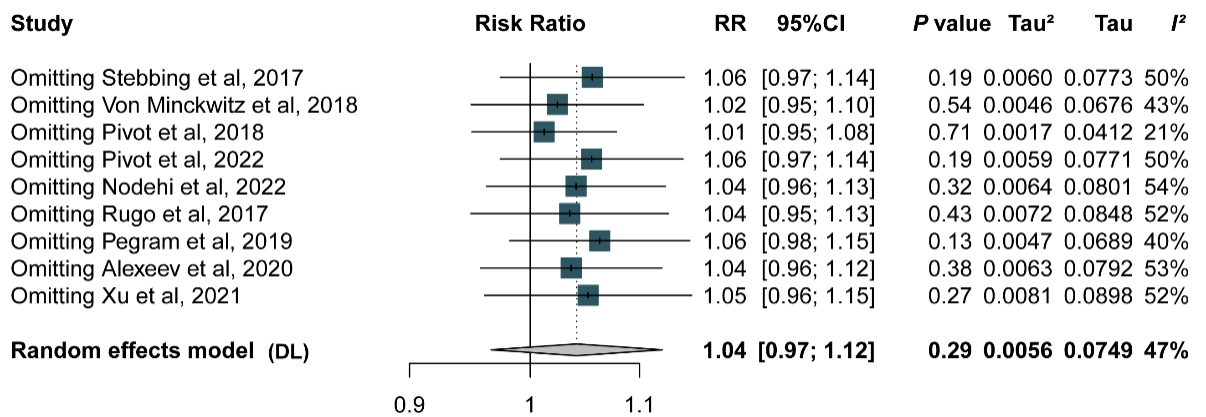

**eFigure 8. Sensitivity analysis of primary efficacy end points for trastuzumab derived from RCTs.**

Abbreviations: DL, dersimonian and laird method. CI, confidence interval.

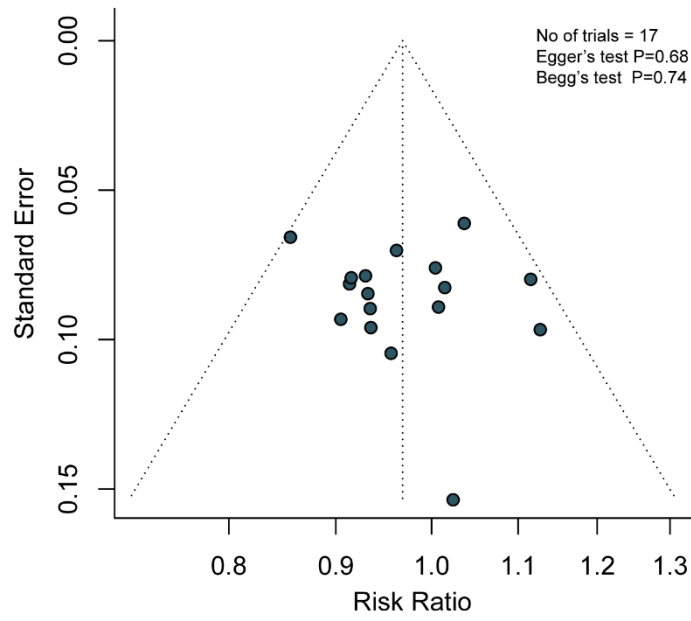

**eFigure 9. Publication bias assessment of primary efficacy end points for bevacizumab derived from RCTs.**

Abbreviations: RCTs: randomized controlled trials.



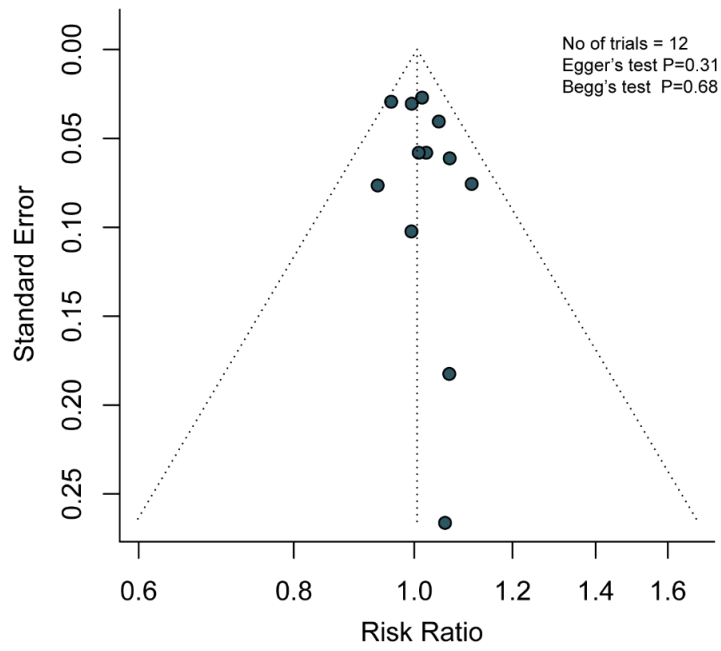

**eFigure 10. Publication bias assessment of primary efficacy end points for rituximab derived from RCTs.**  
Abbreviations: RCTs: randomized controlled trials.

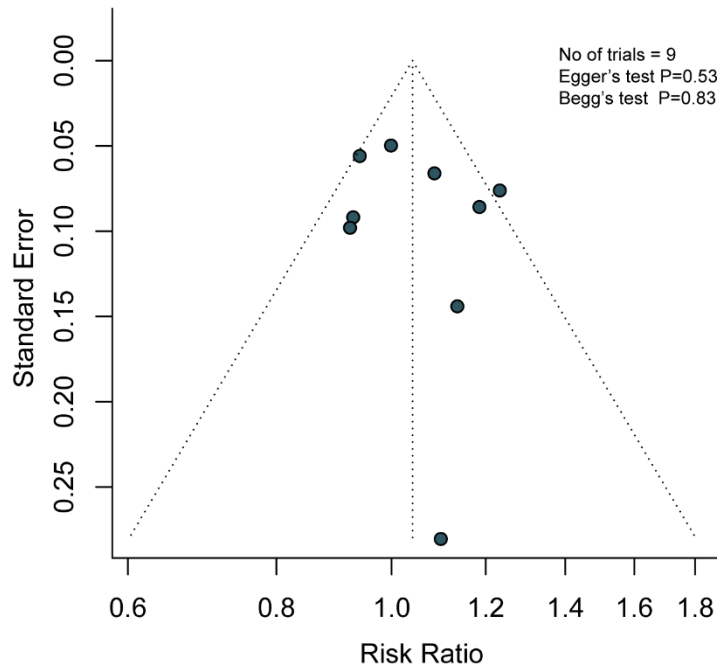

**eFigure 11. Publication bias assessment of primary efficacy end points for trastuzumab derived from RCTs.**

Abbreviations: RCTs: randomized controlled trials.

## eReferences

### eAppendix 3

1. Luo X, Du X, Huang L, et al. The price, efficacy, and safety of within-class targeted anticancer medicines between domestic and imported drugs in China: a comparative analysis. *The Lancet regional health Western Pacific*. 2023;32:100670.
2. Rui M, Li H. Cost-effectiveness of Osimertinib vs Docetaxel-bevacizumab in Third-line Treatment in EGFR T790M Resistance Mutation Advanced Non-Small Cell Lung Cancer in China. *Clinical therapeutics*. 2020;42(11):2159-2170.e2156.
3. Pharnexcloud. National hospital sales volume. Accessed August, 2023. <https://pharma.bcpmdata.com/>.
1. Stroyakovskiy DL, Fadeeva NV, Matrosova MP, et al. Randomized double-blind clinical trial comparing safety and efficacy of the biosimilar BCD-021 with reference bevacizumab. *BMC cancer*. 2022;22(1):129.
2. Thatcher N, Goldschmidt JH, Thomas M, et al. Efficacy and Safety of the Biosimilar ABP 215 Compared with Bevacizumab in Patients with Advanced Nonsquamous Non-small Cell Lung Cancer (MAPLE): A Randomized, Double-blind, Phase III Study. *Clinical cancer research : an official journal of the American Association for Cancer Research*. 2019;25(7):2088-2095.
3. Reinmuth N, Bryl M, Bondarenko I, et al. PF-06439535 (a Bevacizumab Biosimilar) Compared with Reference Bevacizumab (Avastin®), Both Plus Paclitaxel and Carboplatin, as First-Line Treatment for Advanced Non-Squamous Non-Small-Cell Lung Cancer: A Randomized, Double-Blind Study. *BioDrugs : clinical immunotherapeutics, biopharmaceuticals and gene therapy*. 2019;33(5):555-570.
4. Reck M, Luft A, Bondarenko I, et al. A phase III, randomized, double-blind, multicenter study to compare the efficacy, safety, pharmacokinetics, and immunogenicity between SB8 (proposed bevacizumab biosimilar) and reference bevacizumab in patients with metastatic or recurrent nonsquamous non-small cell lung cancer. *Lung cancer*. 2020;146:12-18.
5. Yang Y, Wu B, Huang L, et al. Biosimilar candidate IBI305 plus paclitaxel/carboplatin for the treatment of non-squamous non-small cell lung cancer. *Translational lung cancer research*. 2019;8(6):989-999.
6. Trukhin D, Poddubskaya E, Andric Z, et al. Efficacy, Safety and Immunogenicity of MB02 (Bevacizumab Biosimilar) versus Reference Bevacizumab in Advanced Non-Small Cell Lung Cancer: A Randomized, Double-Blind, Phase III Study (STELLA). *Br J Clin Pharmacol*. 2022; 88( 3): 1063- 1073.
7. Rezvani H, Mortazavizadeh SM, Allahyari A, et al. Efficacy and Safety of Proposed Bevacizumab Biosimilar BE1040V in Patients With Metastatic Colorectal Cancer: A Phase III, Randomized, Double-blind, Noninferiority Clinical Trial. *Clinical therapeutics*. 2020;42(5):848-859.
8. Qin S, Li J, Bai Y, et al. Efficacy, Safety, and Immunogenicity of HLX04 Versus Reference Bevacizumab in Combination with XELOX or mFOLFOX6 as First-Line Treatment for Metastatic Colorectal Cancer: Results of a Randomized, Double-Blind Phase III Study. *BioDrugs*. 2021 Jul;35(4):445-458.
9. Shi Y, Lei K, Jia Y, et al. Bevacizumab biosimilar LY01008 compared with bevacizumab (Avastin) as first-line treatment for Chinese patients with unresectable, metastatic, or recurrent non-squamous non-small-cell lung cancer: A multicenter, randomized, double-blinded, phase III trial. *Cancer Commun*. 2021; 41: 889– 903.
10. Chu T, Lu J, Bi M, et al. Equivalent efficacy study of QL1101 and bevacizumab on untreated advanced non-squamous non-small cell lung cancer patients: a phase 3 randomized, double-blind clinical trial. *Cancer Biol Med*. 2021;18(3):816-824.
11. China National Medical Products Administration. The review reports of bevacizumab biosimilar. Accessed August 4, 2023. <https://file1.dxycdn.com/2022/0922/070/7198507456499203753-117.pdf>

12. Wan R, Dong X, Chen Q, et al. Efficacy and safety of MIL60 compared with bevacizumab in advanced or recurrent non-squamous non-small cell lung cancer: a phase 3 randomized, double-blind study. *EClinicalMedicine*. 2021;42:101187.
13. Syrigos K, Abert I, Andric Z, et al. Efficacy and Safety of Bevacizumab Biosimilar FKB238 Versus Originator Bevacizumab: Results from AVANA, a Phase III Trial in Patients with Non-Squamous Non-Small-Cell Lung Cancer (non-sq-NSCLC). *BioDrugs* .2021;35(4):417-428.
14. Kim ES, Balsler S, Rohr KB, Lohmann R, Liedert B, Schliephake D. Phase 3 Trial of BI 695502 Plus Chemotherapy Versus Bevacizumab Reference Product Plus Chemotherapy in Patients With Advanced Nonsquamous NSCLC. *JTO clinical and research reports*. 2022;3(1):100248.
15. Socinski MA, Waller CF, Idris T, et al. Phase III double-blind study comparing the efficacy and safety of proposed biosimilar MYL-1402O and reference bevacizumab in stage IV non-small-cell lung cancer. *Ther Adv Med Oncol*. 2021;13:17588359211045845.
16. Chen L, Trukhin D, Kolesnik O, et al. Clinical efficacy and safety of the BAT1706 (proposed bevacizumab biosimilar) compared with reference bevacizumab in patients with advanced nonsquamous NSCLC: A randomized, double-blind, phase III study. *Journal of Clinical Oncology*. 2022 40:16\_suppl, 9041-9041.
17. Lu S, Qin S, Zhou Z, et al. Bevacizumab biosimilar candidate TAB008 compared to Avastin® in patients with locally advanced, metastatic EGFR wild-type non-squamous non-small cell lung cancer: a randomized, double-blind, multicenter study. *Journal of cancer research and clinical oncology*. 2023;149(9):5907-5914.
18. Verschraegen C, Andric Z, Moiseenko F, et al. Candidate Bevacizumab Biosimilar CT-P16 versus European Union Reference Bevacizumab in Patients with Metastatic or Recurrent Non-Small Cell Lung Cancer: A Randomized Controlled Trial. *BioDrugs*. 2022;36(6):749-760.
19. Kaplanov K, Zaritskiy A, Alexeev S, et al. Key Results of International Randomized Open-Label Clinical Study of BCD-020 (rituximab biosimilar candidate) in Patients with B-Cell Non-Hodgkin's Lymphoma. *Blood*. 2014;124(21):5467-5467.
20. Toogeh G, Faranoush M, Razavi SM, et al. A Double-Blind, Randomized Comparison Study between Zytux™ vs MabThera® in Treatment of CLL with FCR Regimen: Non-Inferiority Clinical Trial. *Int J Hematol Oncol Stem Cell Res*. 2018 Apr 1;12(2):84-91.
21. Jurczak W, Moreira I, Kanakasetty GB, et al. Rituximab biosimilar and reference rituximab in patients with previously untreated advanced follicular lymphoma (ASSIST-FL): primary results from a confirmatory phase 3, double-blind, randomised, controlled study. *The Lancet Haematology*. 2017;4(8):e350-e361.
22. Kim WS, Buske C, Ogura M, et al. Efficacy, pharmacokinetics, and safety of the biosimilar CT-P10 compared with rituximab in patients with previously untreated advanced-stage follicular lymphoma: a randomised, double-blind, parallel-group, non-inferiority phase 3 trial. *The Lancet Haematology*. 2017;4(8):e362-e373.
23. Ogura M, Sancho JM, Cho SG, et al. Efficacy, pharmacokinetics, and safety of the biosimilar CT-P10 in comparison with rituximab in patients with previously untreated low-tumour-burden follicular lymphoma: a randomised, double-blind, parallel-group, phase 3 trial. *The Lancet Haematology*. 2018;5(11):e543-e553.
24. Poddubnaya IV, Alekseev SM, Kaplanov KD, et al. Proposed rituximab biosimilar BCD-020 versus reference rituximab for treatment of patients with indolent non-Hodgkin lymphomas: An international multicenter randomized trial. *Hematological oncology*. 2020;38(1):67-73.
25. Candelaria M, González DE, Delamain MT, et al. Rituximab biosimilar RTX83 versus reference rituximab in combination with CHOP as first-line treatment for diffuse large B-cell lymphoma: a randomized, double-blind study. *Leukemia & lymphoma*. 2019;60(14):3375-3385.
26. Sharman JP, Liberati AM, Ishizawa K, et al. A Randomized, Double-Blind, Efficacy and Safety Study of PF-05280586 (a Rituximab Biosimilar) Compared with Rituximab Reference Product (MabThera®) in Subjects with Previously Untreated CD20-Positive, Low-Tumor-Burden Follicular Lymphoma (LTB-FL). *BioDrugs*. 2020;34(2):171-181.
27. Niederwieser D, Hamm C, Cobb P, et al. Efficacy and Safety of ABP 798: Results from

- the JASMINE Trial in Patients with Follicular Lymphoma in Comparison with Rituximab Reference Product. *Targeted oncology*. 2020;15(5):599-611.
28. Clinicaltrials.gov. A Randomized, Double-blind, Multi-center, Multi-national Trial to Evaluate the Efficacy, Safety, and Immunogenicity of SAIT101 Versus Rituximab as a First-line Immunotherapy Treatment in Patients With Low Tumor Burden Follicular Lymphoma. Accessed August 4, 2023. <https://clinicaltrials.gov/study/NCT02809053?term=NCT02809053&rank=1>.
  29. Shi Y, Song Y, Qin Y, et al. A phase 3 study of rituximab biosimilar HLX01 in patients with diffuse large B-cell lymphoma. *Journal of hematology & oncology*. 2020;13(1):38.
  30. Song Y, Zhou H, Zhang H, et al. Efficacy and Safety of the Biosimilar IBI301 Plus Standard CHOP (I-CHOP) in Comparison With Rituximab Plus CHOP (R-CHOP) in Patients with Previously Untreated Diffuse Large B-Cell Lymphoma (DLBCL): A Randomized, Double-Blind, Parallel-Group, Phase 3 Trial. *Advances in therapy*. 2021;38(4):1889-1903.
  31. Stebbing J, Baranau Y, Baryash V, et al. CT-P6 compared with reference trastuzumab for HER2-positive breast cancer: a randomised, double-blind, active-controlled, phase 3 equivalence trial. *The Lancet Oncology*. 2017;18(7):917-928.
  32. Rugo HS, Barve A, Waller CF, et al. Effect of a Proposed Trastuzumab Biosimilar Compared With Trastuzumab on Overall Response Rate in Patients With ERBB2 (HER2)-Positive Metastatic Breast Cancer: A Randomized Clinical Trial. *JAMA*. 2017;317(1):37-47.
  33. von Minckwitz G, Colleoni M, Kolberg HC, et al. Efficacy and safety of ABP 980 compared with reference trastuzumab in women with HER2-positive early breast cancer (LILAC study): a randomised, double-blind, phase 3 trial. *The Lancet Oncology*. 2018;19(7):987-998.
  34. Pivot X, Bondarenko I, Nowecki Z, et al. Phase III, Randomized, Double-Blind Study Comparing the Efficacy, Safety, and Immunogenicity of SB3 (Trastuzumab Biosimilar) and Reference Trastuzumab in Patients Treated With Neoadjuvant Therapy for Human Epidermal Growth Factor Receptor 2-Positive Early Breast Cancer. *Journal of clinical oncology*. 2018;36(10):968-974.
  35. Pegram MD, Bondarenko I, Zorzetto MMC, et al. PF-05280014 (a trastuzumab biosimilar) plus paclitaxel compared with reference trastuzumab plus paclitaxel for HER2-positive metastatic breast cancer: a randomised, double-blind study. *British journal of cancer*. 2019;120(2):172-182.
  36. Pivot X, Georgievich MA, Shamrai V, et al. Efficacy of HD201 vs Referent Trastuzumab in Patients With ERBB2-Positive Breast Cancer Treated in the Neoadjuvant Setting: A Multicenter Phase 3 Randomized Clinical Trial. *JAMA oncology*. 2022;8(5):698-705.
  37. Alexeev SM, Khorinko AV, Mukhametshina GZ, et al. Randomized double-blind clinical trial comparing safety and efficacy of the biosimilar BCD-022 with reference trastuzumab. *BMC cancer*. 2020;20(1):783.
  38. Xu B, Zhang Q, Sun T, et al. Efficacy, Safety, and Immunogenicity of HLX02 Compared with Reference Trastuzumab in Patients with Recurrent or Metastatic HER2-Positive Breast Cancer: A Randomized Phase III Equivalence Trial. *BioDrugs*. 2021;35(3):337-350.
  39. Nodehi RS, Kalantari B, Raafat J, et al. A randomized, double-blind, phase III, non-inferiority clinical trial comparing the efficacy and safety of TA4415V (a proposed Trastuzumab biosimilar) and Herceptin (Trastuzumab reference product) in HER2-positive early-stage breast Cancer patients. *BMC pharmacology & toxicology*. 2022;23(1):57.
  40. Roy PS, John S, Karankal S, et al. Comparison of the efficacy and safety of Rituximab (Mabthera™) and its biosimilar (Reditux™) in diffuse large B-cell lymphoma patients treated with chemo-immunotherapy: A retrospective analysis. *Indian journal of medical and paediatric oncology*. 2013;34(4):292-298.
  41. Bankar A, Korula A, Abraham A, et al. Comparison of the Efficacy of Innovator Rituximab and its Biosimilars in Diffuse Large B Cell Lymphoma Patients: A Retrospective Analysis. *Indian journal of hematology & blood transfusion*. 2020;36(1):71-77.
  42. Deng W, Yang S, Yang C, et al. Rituximab biosimilar HLX01 versus reference rituximab in the treatment of diffuse large B-cell lymphoma: Real-world clinical

- experience. *Journal of oncology pharmacy practice*. 2022;10781552221110470.
43. Zhao Z, Zhao L, Xia G, et al. Efficacy and safety of bevacizumab biosimilar compared with reference bevacizumab in locally advanced and advanced non-small cell lung cancer patients: A retrospective study. *Frontiers in oncology*. 2022;12:1036906.
  44. Bae SJ, Kim JH, Ahn SG, et al. Real-World Clinical Outcomes of Biosimilar Trastuzumab (CT-P6) in HER2-Positive Early-Stage and Metastatic Breast Cancer. *Frontiers in oncology*. 2021;11:689587.
  45. Park JH, Yeo JH, Kim YS, et al. Efficacy and Safety of Trastuzumab Biosimilar (CT-P6) Compared With Reference Trastuzumab in Patients With HER2-positive Advanced Gastric Cancer: A Retrospective Analysis. *Am J Clin Oncol*. 2022;45(2):61-65.
  46. Yang C, Khwaja R, Tang P, Nixon N, King K, Lupichuk S. A Review of Trastuzumab Biosimilars in Early Breast Cancer and Real World Outcomes of Neoadjuvant MYL-1401O versus Reference Trastuzumab. *Curr Oncol*. 2022;29(6):4224-4234.
  47. Bernat-Peguera A, Trigueros M, Ferrando-Díez A, et al. Efficacy of CT-P6 (trastuzumab biosimilar) versus reference trastuzumab in combination with pertuzumab in HER2-positive early-stage breast cancer: Preclinical and real-life clinical data. *Breast*. 2022;62:1-9.
  48. Eser K, Sezer E, Erçolak V, İnal A. Evaluation of biosimilar trastuzumab MYL-1401O in HER2-positive breast cancer. *The American journal of managed care*. 2023;29(2):e36-e42.
  49. Liu Z, Guan Y, Yao Y, et al. Effectiveness and Safety of Zercepac and Reference Trastuzumab in the Neoadjuvant Setting for Early-Stage Breast Cancer: A Retrospective Cohort Study. *Journal of oncology*. 2022;2022:9998114.
