# Supplementary material for: Clinical Benefit, Price, and Uptake for Cancer Biosimilars vs Reference Drugs in China: A Systematic Review and Meta-Analysis
Source: PubMed Central journal article supplement (PMC10570888; doi:10.1001/jamanetworkopen.2023.37348), 2023-10-12
Supplement: jamanetwopen-e2337348-s002.pdf [file jamanetwopen-e2337348-s002.pdf]

## **Data Sharing Statement**

Luo. Clinical Benefit, Price, and Uptake for Cancer Biosimilars vs Reference Drugs in China. *JAMA Netw Open*. Published October 12, 2023. doi:10.1001/jamanetworkopen.2023.37348

### **Data**

**Data available:** No
